# Supplementary material for: ETO family protein Mtgr1 mediates Prdm14 functions in stem cell maintenance and primordial germ cell formation
Source: eLife. 2015 Nov 2;4:e10150. doi: 10.7554/eLife.10150 (PMC4749557; doi:10.7554/eLife.10150)
Supplement: Figure 1—source data 1. — DOI: http://dx.doi.org/10.7554/eLife.10150.004 [file elife-10150-fig1-data1.xlsx]

## Sheet: Samples Report
Supplementary Table 1. List of proteins recovered from Prdm14 IP-MS experiment.
		Displaying:Percent Coverage			Prdm14	Prdm14	Prdm14	Prdm14	Uncategorized Sample	Uncategorized Sample	ctl	ctl	ctl	ctl		Prdm14	control
#	Visible?	Identified Proteins (794/809)	Accession Number	Molecular Weight	P1	P2	P3	P4	M1	M2	L1	L2	L3	L4		total	total
2	TRUE	Protein CBFA2T2 OS=Mus musculus GN=Cbfa2t2 PE=1 SV=3	sp|O70374|MTG8R_MOUSE	66 kDa	0	0.45	0.35	0.22	0.33	0.33	0	0	0	0		1.02	0
20	TRUE	Nucleus accumbens-associated protein 1 OS=Mus musculus GN=Nacc1 PE=2 SV=1	sp|Q7TSZ8|NACC1_MOUSE	57 kDa	0	0.35	0.55	0.078	0.097	0.2	0	0.041	0.13	0		0.978	0.171
36	TRUE	RuvB-like 2 OS=Mus musculus GN=Ruvbl2 PE=2 SV=3	sp|Q9WTM5|RUVB2_MOUSE	51 kDa	0	0	0.39	0.3	0.026	0.11	0	0	0.08	0.091		0.69	0.171
16	TRUE	T-complex protein 1 subunit alpha OS=Mus musculus GN=Tcp1 PE=1 SV=3	sp|P11983|TCPA_MOUSE	60 kDa	0	0.13	0.46	0	0.28	0.36	0	0.038	0.14	0		0.59	0.178
18	TRUE	T-complex protein 1 subunit beta OS=Mus musculus GN=Cct2 PE=1 SV=4	sp|P80314|TCPB_MOUSE	57 kDa	0	0	0.45	0.12	0.44	0.35	0	0	0.19	0		0.57	0.19
47	TRUE	F-box-like/WD repeat-containing protein TBL1XR1 OS=Mus musculus GN=Tbl1xr1 PE=2 SV=1	sp|Q8BHJ5|TBL1R_MOUSE	56 kDa	0	0	0.36	0.2	0.11	0.076	0	0	0	0		0.56	0
15	TRUE	T-complex protein 1 subunit delta OS=Mus musculus GN=Cct4 PE=1 SV=3	sp|P80315|TCPD_MOUSE	58 kDa	0	0.078	0.48	0	0.38	0.36	0	0	0.15	0		0.558	0.15
24	TRUE	Transcriptional repressor p66 alpha OS=Mus musculus GN=Gatad2a PE=1 SV=2	sp|Q8CHY6|P66A_MOUSE	67 kDa	0	0.33	0.2	0	0.22	0.18	0	0.035	0.019	0		0.53	0.054
23	TRUE	T-complex protein 1 subunit epsilon OS=Mus musculus GN=Cct5 PE=1 SV=1	sp|P80316|TCPE_MOUSE	60 kDa	0	0.13	0.36	0	0.37	0.24	0	0	0.081	0		0.49	0.081
49	TRUE	Sentrin-specific protease 3 OS=Mus musculus GN=Senp3 PE=1 SV=1	sp|Q9EP97|SENP3_MOUSE	64 kDa	0	0.26	0.21	0	0.18	0.15	0	0	0.048	0		0.47	0.048
17	TRUE	T-complex protein 1 subunit eta OS=Mus musculus GN=Cct7 PE=1 SV=1	sp|P80313|TCPH_MOUSE	60 kDa	0	0.022	0.42	0	0.42	0.33	0	0	0.07	0		0.442	0.07
66	TRUE	SWI/SNF-related matrix-associated actin-dependent regulator of chromatin subfamily E member 1 OS=Mus musculus GN=Smarce1 PE=1 SV=1	sp|O54941|SMCE1_MOUSE	47 kDa	0	0	0.41	0.032	0.17	0.16	0	0	0.032	0.032		0.442	0.064
27	TRUE	T-complex protein 1 subunit zeta OS=Mus musculus GN=Cct6a PE=1 SV=3	sp|P80317|TCPZ_MOUSE	58 kDa	0	0.066	0.31	0.032	0.2	0.21	0	0	0.13	0		0.408	0.13
48	TRUE	REST corepressor 2 OS=Mus musculus GN=Rcor2 PE=2 SV=1	sp|Q8C796|RCOR2_MOUSE	58 kDa	0	0.29	0.082	0	0.12	0.084	0	0.019	0.027	0		0.372	0.046
44	TRUE	Histone deacetylase 2 OS=Mus musculus GN=Hdac2 PE=1 SV=1	sp|P70288|HDAC2_MOUSE	55 kDa	0	0.074	0.28	0	0.23	0.13	0	0	0.1	0		0.354	0.1
93	TRUE	Heterogeneous nuclear ribonucleoprotein H OS=Mus musculus GN=Hnrnph1 PE=1 SV=3	sp|O35737|HNRH1_MOUSE	49 kDa	0	0	0.18	0.17	0.038	0.073	0	0	0.038	0.076		0.35	0.114
79	TRUE	60S ribosomal protein L4 OS=Mus musculus GN=Rpl4 PE=1 SV=3	sp|Q9D8E6|RL4_MOUSE	47 kDa	0	0	0.053	0.29	0	0	0	0	0.053	0.062		0.343	0.115
85	TRUE	F-box-like/WD repeat-containing protein TBL1X OS=Mus musculus GN=Tbl1x PE=2 SV=2	sp|Q9QXE7|TBL1X_MOUSE	57 kDa	0	0	0.23	0.099	0.021	0.021	0	0	0	0		0.329	0
72	TRUE	Protein CBFA2T1 OS=Mus musculus GN=Runx1t1 PE=2 SV=1	sp|Q61909|MTG8_MOUSE	64 kDa	0	0.27	0.054	0	0.054	0.062	0	0	0	0		0.324	0
34	TRUE	Probable ATP-dependent RNA helicase DDX17 OS=Mus musculus GN=Ddx17 PE=2 SV=1	sp|Q501J6|DDX17_MOUSE	72 kDa	0	0.19	0.13	0	0.19	0.16	0	0.077	0.052	0		0.32	0.129
398	TRUE	Ig kappa chain V-III region PC 2880/PC 1229 OS=Mus musculus PE=1 SV=1	sp|P01654|KV3A1_MOUSE	12 kDa	0	0	0	0.31	0	0	0	0	0	0		0.31	0
306	TRUE	Ig lambda-1 chain C region OS=Mus musculus PE=1 SV=1	sp|P01843|LAC1_MOUSE	12 kDa	0	0	0	0.3	0	0	0	0	0	0		0.3	0
43	TRUE	Probable ATP-dependent RNA helicase DDX5 OS=Mus musculus GN=Ddx5 PE=1 SV=2	sp|Q61656|DDX5_MOUSE	69 kDa	0	0.098	0.2	0	0.093	0.065	0	0	0.028	0		0.298	0.028
28	TRUE	Metastasis-associated protein MTA2 OS=Mus musculus GN=Mta2 PE=1 SV=1	sp|Q9R190|MTA2_MOUSE	75 kDa	0	0.24	0.058	0	0.18	0.19	0	0.07	0.013	0		0.298	0.083
114	TRUE	Heterogeneous nuclear ribonucleoprotein F OS=Mus musculus GN=Hnrnpf PE=1 SV=3	sp|Q9Z2X1|HNRPF_MOUSE	46 kDa	0	0	0.08	0.21	0	0	0	0	0	0.041		0.29	0.041
39	TRUE	Polyadenylate-binding protein 1 OS=Mus musculus GN=Pabpc1 PE=1 SV=2	sp|P29341|PABP1_MOUSE	71 kDa	0	0.27	0.017	0	0.22	0.22	0	0.13	0	0		0.287	0.13
229	TRUE	Ig kappa chain V-II region 2S1.3 OS=Mus musculus PE=1 SV=1	sp|P01629|KV2A4_MOUSE	12 kDa	0	0.14	0.14	0	0.14	0.14	0	0	0	0		0.28	0
57	TRUE	Transcriptional repressor p66-beta OS=Mus musculus GN=Gatad2b PE=1 SV=1	sp|Q8VHR5|P66B_MOUSE	65 kDa	0	0.2	0.061	0	0.1	0.18	0	0	0.022	0		0.261	0.022
134	TRUE	60S ribosomal protein L7a OS=Mus musculus GN=Rpl7a PE=2 SV=2	sp|P12970|RL7A_MOUSE	30 kDa	0	0	0	0.26	0	0	0	0	0	0.14		0.26	0.14
191	TRUE	Histone deacetylase 3 OS=Mus musculus GN=Hdac3 PE=1 SV=1	sp|O88895|HDAC3_MOUSE	48 kDa	0	0	0.035	0.22	0	0	0	0	0	0		0.255	0
258	TRUE	mRNA export factor OS=Mus musculus GN=Rae1 PE=1 SV=1	sp|Q8C570|RAE1L_MOUSE	41 kDa	0	0	0	0.25	0	0	0	0	0	0		0.25	0
234	TRUE	40S ribosomal protein S8 OS=Mus musculus GN=Rps8 PE=1 SV=2	sp|P62242|RS8_MOUSE	24 kDa	0	0	0	0.25	0	0	0	0	0	0.12		0.25	0.12
189	TRUE	Zinc finger protein ubi-d4 OS=Mus musculus GN=Dpf2 PE=1 SV=1	sp|Q61103|REQU_MOUSE	44 kDa	0	0	0.038	0.21	0	0	0	0	0	0.038		0.248	0.038
444	TRUE	Cleavage and polyadenylation specificity factor subunit 4 OS=Mus musculus GN=Cpsf4 PE=2 SV=1	sp|Q8BQZ5|CPSF4_MOUSE	24 kDa	0	0	0	0.24	0	0	0	0	0	0		0.24	0
98	TRUE	60S ribosomal protein L7 OS=Mus musculus GN=Rpl7 PE=2 SV=2	sp|P14148|RL7_MOUSE	31 kDa	0	0	0	0.24	0	0	0	0	0	0.093		0.24	0.093
73	TRUE	Elongation factor 1-alpha 1 OS=Mus musculus GN=Eef1a1 PE=1 SV=3	sp|P10126|EF1A1_MOUSE	50 kDa	0	0	0.024	0.21	0.05	0.076	0	0	0	0.078		0.234	0.078
33	TRUE	Metastasis-associated protein MTA1 OS=Mus musculus GN=Mta1 PE=1 SV=1	sp|Q8K4B0|MTA1_MOUSE	81 kDa	0	0.18	0.053	0	0.17	0.1	0	0.1	0.014	0		0.233	0.114
751	TRUE	Ig kappa chain V-III region PC 7043 OS=Mus musculus PE=1 SV=1	sp|P01665|KV3AD_MOUSE	12 kDa	0	0	0	0.23	0	0	0	0	0	0		0.23	0
46	TRUE	Stress-70 protein, mitochondrial OS=Mus musculus GN=Hspa9 PE=1 SV=2	sp|P38647|GRP75_MOUSE	74 kDa	0	0.23	0	0	0.12	0.12	0	0.059	0	0		0.23	0.059
89	TRUE	Elongation factor 1-gamma OS=Mus musculus GN=Eef1g PE=1 SV=3	sp|Q9D8N0|EF1G_MOUSE	50 kDa	0	0	0.03	0.2	0.053	0.062	0	0	0	0.085		0.23	0.085
54	TRUE	26S proteasome non-ATPase regulatory subunit 3 OS=Mus musculus GN=Psmd3 PE=2 SV=3	sp|P14685|PSMD3_MOUSE	61 kDa	0	0	0.23	0	0.33	0.25	0	0	0.092	0		0.23	0.092
65	TRUE	Tubulin beta-5 chain OS=Mus musculus GN=Tubb5 PE=1 SV=1	sp|P99024|TBB5_MOUSE	50 kDa	0	0	0.16	0.061	0.099	0.061	0	0	0.061	0.027		0.221	0.088
90	TRUE	Transcription initiation factor TFIID subunit 6 OS=Mus musculus GN=Taf6 PE=2 SV=1	sp|Q62311|TAF6_MOUSE	73 kDa	0	0.22	0	0	0.016	0.068	0	0	0	0		0.22	0
145	TRUE	Protein phosphatase 1B OS=Mus musculus GN=Ppm1b PE=2 SV=1	sp|P36993|PPM1B_MOUSE	43 kDa	0	0.033	0.062	0.12	0.033	0	0	0	0.079	0		0.215	0.079
64	TRUE	Eukaryotic translation initiation factor 3 subunit D OS=Mus musculus GN=Eif3d PE=1 SV=2	sp|O70194|EIF3D_MOUSE	64 kDa	0	0.071	0.14	0	0.28	0.12	0	0	0.086	0		0.211	0.086
58	TRUE	Highly divergent homeobox OS=Mus musculus GN=Hdx PE=2 SV=1	sp|Q14B70|HDX_MOUSE	77 kDa	0	0.14	0.056	0.014	0.12	0.09	0.052	0.048	0	0		0.21	0.1
241	TRUE	SWI/SNF-related matrix-associated actin-dependent regulator of chromatin subfamily B member 1 OS=Mus musculus GN=Smarcb1 PE=1 SV=1	sp|Q9Z0H3|SNF5_MOUSE	44 kDa	0	0	0	0.21	0	0	0	0	0	0		0.21	0
78	TRUE	General transcription factor IIF subunit 1 OS=Mus musculus GN=Gtf2f1 PE=1 SV=2	sp|Q3THK3|T2FA_MOUSE	57 kDa	0	0.21	0	0	0.089	0.051	0	0.067	0.02	0		0.21	0.087
278	TRUE	Nuclease-sensitive element-binding protein 1 OS=Mus musculus GN=Ybx1 PE=1 SV=3	sp|P62960|YBOX1_MOUSE	36 kDa	0	0	0	0.21	0	0	0	0	0	0.093		0.21	0.093
95	TRUE	Sal-like protein 4 OS=Mus musculus GN=Sall4 PE=1 SV=2	sp|Q8BX22|SALL4_MOUSE	113 kDa	0.078	0.097	0.016	0.016	0	0.017	0.031	0	0	0		0.207	0.031
144	TRUE	Zinc finger and SCAN domain containing protein 4C OS=Mus musculus GN=Zscan4c PE=2 SV=1	sp|Q80VJ6|ZSC4C_MOUSE	58 kDa	0	0.093	0.089	0.02	0	0	0	0	0	0		0.202	0
63	TRUE	Transcription factor 12 OS=Mus musculus GN=Tcf12 PE=1 SV=2	sp|Q61286|HTF4_MOUSE	76 kDa	0	0.2	0	0	0.23	0.2	0	0	0	0		0.2	0
239	TRUE	Poly(rC)-binding protein 1 OS=Mus musculus GN=Pcbp1 PE=1 SV=1	sp|P60335|PCBP1_MOUSE	37 kDa	0	0	0	0.2	0	0	0	0	0	0		0.2	0
515	TRUE	Ig kappa chain V-V region K2 (Fragment) OS=Mus musculus PE=1 SV=1	sp|P01635|KV5A3_MOUSE	13 kDa	0	0	0	0.2	0	0	0	0	0	0		0.2	0
74	TRUE	Pre-mRNA 3'-end-processing factor FIP1 OS=Mus musculus GN=Fip1l1 PE=1 SV=1	sp|Q9D824|FIP1_MOUSE	65 kDa	0	0.17	0.024	0	0.16	0.16	0	0.076	0	0		0.194	0.076
102	TRUE	Tubulin beta-4A chain OS=Mus musculus GN=Tubb4a PE=1 SV=3	sp|Q9D6F9|TBB4A_MOUSE	50 kDa	0	0	0.097	0.097	0.097	0.097	0	0	0.072	0.02		0.194	0.092
183	TRUE	60S ribosomal protein L18 OS=Mus musculus GN=Rpl18 PE=2 SV=3	sp|P35980|RL18_MOUSE	22 kDa	0	0	0	0.19	0	0	0	0	0	0		0.19	0
82	TRUE	26S protease regulatory subunit 4 OS=Mus musculus GN=Psmc1 PE=1 SV=1	sp|P62192|PRS4_MOUSE	49 kDa	0	0	0.16	0.027	0.2	0.12	0	0	0.061	0		0.187	0.061
56	TRUE	Putative ATP-dependent RNA helicase Pl10 OS=Mus musculus GN=D1Pas1 PE=1 SV=1	sp|P16381|DDX3L_MOUSE	73 kDa	0	0.18	0	0	0.13	0.13	0	0.036	0	0		0.18	0.036
101	TRUE	RNA-binding protein 39 OS=Mus musculus GN=Rbm39 PE=1 SV=2	sp|Q8VH51|RBM39_MOUSE	59 kDa	0	0.12	0.06	0	0.12	0.072	0	0.053	0	0		0.18	0.053
107	TRUE	DNA methyltransferase 1-associated protein 1 OS=Mus musculus GN=Dmap1 PE=1 SV=1	sp|Q9JI44|DMAP1_MOUSE	53 kDa	0	0	0.18	0	0	0	0	0	0.066	0		0.18	0.066
178	TRUE	Armadillo repeat-containing protein 8 OS=Mus musculus GN=Armc8 PE=1 SV=2	sp|Q9DBR3|ARMC8_MOUSE	75 kDa	0	0.14	0.031	0	0	0	0	0.016	0	0		0.171	0.016
352	TRUE	Nuclear distribution protein nudE homolog 1 OS=Mus musculus GN=Nde1 PE=1 SV=1	sp|Q9CZA6|NDE1_MOUSE	39 kDa	0	0	0	0.17	0	0	0	0	0	0		0.17	0
534	TRUE	Ig kappa chain V-V region MOPC 173 OS=Mus musculus PE=1 SV=1	sp|P01643|KV5AA_MOUSE	12 kDa	0	0	0	0.17	0	0	0	0	0	0		0.17	0
776	TRUE	Ribonuclease P protein subunit p14 OS=Mus musculus GN=Rpp14 PE=2 SV=1	sp|Q9CQH8|RPP14_MOUSE	14 kDa	0	0	0	0.17	0	0	0	0	0	0		0.17	0
41	TRUE	Eukaryotic translation initiation factor 4B OS=Mus musculus GN=Eif4b PE=1 SV=1	sp|Q8BGD9|IF4B_MOUSE	69 kDa	0	0.15	0.018	0	0.15	0.11	0	0.038	0	0		0.168	0.038
77	TRUE	Metastasis-associated protein MTA3 OS=Mus musculus GN=Mta3 PE=1 SV=1	sp|Q924K8|MTA3_MOUSE	67 kDa	0	0.051	0.11	0	0.11	0.091	0	0	0.069	0		0.161	0.069
354	TRUE	Proteasome subunit alpha type-6 OS=Mus musculus GN=Psma6 PE=1 SV=1	sp|Q9QUM9|PSA6_MOUSE	27 kDa	0	0	0	0.16	0	0	0	0	0	0		0.16	0
391	TRUE	Proteasome activator complex subunit 3 OS=Mus musculus GN=Psme3 PE=1 SV=1	sp|P61290|PSME3_MOUSE	30 kDa	0	0	0	0.16	0	0	0	0	0	0		0.16	0
142	TRUE	Influenza virus NS1A-binding protein homolog OS=Mus musculus GN=Ivns1abp PE=1 SV=2	sp|Q920Q8|NS1BP_MOUSE	72 kDa	0	0.16	0	0	0.048	0.062	0	0.034	0	0		0.16	0.034
130	TRUE	60 kDa heat shock protein, mitochondrial OS=Mus musculus GN=Hspd1 PE=1 SV=1	sp|P63038|CH60_MOUSE	61 kDa	0	0	0.16	0	0.042	0.037	0	0	0.038	0		0.16	0.038
343	TRUE	40S ribosomal protein S2 OS=Mus musculus GN=Rps2 PE=1 SV=3	sp|P25444|RS2_MOUSE	31 kDa	0	0	0	0.16	0	0	0	0	0	0.038		0.16	0.038
68	TRUE	Protein RCC2 OS=Mus musculus GN=Rcc2 PE=2 SV=1	sp|Q8BK67|RCC2_MOUSE	56 kDa	0	0	0.16	0	0.17	0.15	0	0	0.04	0		0.16	0.04
76	TRUE	Lysine--tRNA ligase OS=Mus musculus GN=Kars PE=1 SV=1	sp|Q99MN1|SYK_MOUSE	68 kDa	0	0.16	0	0	0.17	0.074	0	0.04	0	0		0.16	0.04
221	TRUE	60S ribosomal protein L14 OS=Mus musculus GN=Rpl14 PE=2 SV=3	sp|Q9CR57|RL14_MOUSE	24 kDa	0	0	0	0.16	0	0	0	0	0	0.055		0.16	0.055
100	TRUE	Retinoblastoma-binding protein 5 OS=Mus musculus GN=Rbbp5 PE=1 SV=2	sp|Q8BX09|RBBP5_MOUSE	59 kDa	0	0.11	0.043	0	0.043	0.02	0	0	0.02	0		0.153	0.02
181	TRUE	60S ribosomal protein L3 OS=Mus musculus GN=Rpl3 PE=2 SV=3	sp|P27659|RL3_MOUSE	46 kDa	0	0	0	0.15	0	0	0	0	0	0		0.15	0
202	TRUE	Methylcrotonoyl-CoA carboxylase subunit alpha, mitochondrial OS=Mus musculus GN=Mccc1 PE=2 SV=2	sp|Q99MR8|MCCA_MOUSE	79 kDa	0	0.15	0	0	0	0	0	0	0	0		0.15	0
312	TRUE	ETS domain-containing transcription factor ERF OS=Mus musculus GN=Erf PE=2 SV=1	sp|P70459|ERF_MOUSE	59 kDa	0	0.15	0	0	0	0	0	0	0	0		0.15	0
71	TRUE	Importin subunit alpha-2 OS=Mus musculus GN=Kpna2 PE=1 SV=2	sp|P52293|IMA2_MOUSE	58 kDa	0	0	0.15	0	0.24	0.19	0	0	0.053	0		0.15	0.053
75	TRUE	Serine/threonine-protein phosphatase 2A 65 kDa regulatory subunit A alpha isoform OS=Mus musculus GN=Ppp2r1a PE=1 SV=3	sp|Q76MZ3|2AAA_MOUSE	65 kDa	0	0	0.15	0	0.15	0.11	0	0	0.056	0		0.15	0.056
170	TRUE	Transcriptional repressor protein YY1 OS=Mus musculus GN=Yy1 PE=1 SV=1	sp|Q00899|TYY1_MOUSE	45 kDa	0	0.048	0.092	0	0.048	0.048	0	0	0	0		0.14	0
319	TRUE	POU domain, class 5, transcription factor 1 OS=Mus musculus GN=Pou5f1 PE=1 SV=1	sp|P20263|PO5F1_MOUSE	38 kDa	0	0	0	0.14	0	0	0	0	0	0		0.14	0
355	TRUE	60S ribosomal protein L8 OS=Mus musculus GN=Rpl8 PE=2 SV=2	sp|P62918|RL8_MOUSE	28 kDa	0	0	0	0.14	0	0	0	0	0	0		0.14	0
135	TRUE	RNA-binding protein 14 OS=Mus musculus GN=Rbm14 PE=1 SV=1	sp|Q8C2Q3|RBM14_MOUSE	69 kDa	0	0.12	0	0.015	0.076	0.037	0	0	0	0		0.135	0
138	TRUE	Parafibromin OS=Mus musculus GN=Cdc73 PE=2 SV=1	sp|Q8JZM7|CDC73_MOUSE	61 kDa	0	0	0.13	0	0.056	0	0	0	0	0		0.13	0
310	TRUE	DnaJ homolog subfamily B member 6 OS=Mus musculus GN=Dnajb6 PE=1 SV=4	sp|O54946|DNJB6_MOUSE	40 kDa	0	0	0	0.13	0	0	0	0	0	0		0.13	0
320	TRUE	Hsp90 co-chaperone Cdc37 OS=Mus musculus GN=Cdc37 PE=2 SV=1	sp|Q61081|CDC37_MOUSE	45 kDa	0	0	0	0.13	0	0	0	0	0	0		0.13	0
440	TRUE	Heat shock protein beta-1 OS=Mus musculus GN=Hspb1 PE=1 SV=3	sp|P14602|HSPB1_MOUSE	23 kDa	0	0	0	0.13	0	0	0	0	0	0		0.13	0
628	TRUE	Small ubiquitin-related modifier 2 OS=Mus musculus GN=Sumo2 PE=2 SV=1	sp|P61957|SUMO2_MOUSE	11 kDa	0	0.13	0	0	0	0	0	0	0	0		0.13	0
707	TRUE	Dual specificity protein phosphatase 23 OS=Mus musculus GN=Dusp23 PE=2 SV=1	sp|Q6NT99|DUS23_MOUSE	17 kDa	0	0	0.13	0	0	0	0	0	0	0		0.13	0
67	TRUE	Protein arginine N-methyltransferase 5 OS=Mus musculus GN=Prmt5 PE=1 SV=3	sp|Q8CIG8|ANM5_MOUSE	73 kDa	0	0.093	0.036	0	0.12	0.14	0	0	0	0		0.129	0
103	TRUE	Cleavage and polyadenylation specificity factor subunit 3 OS=Mus musculus GN=Cpsf3 PE=1 SV=2	sp|Q9QXK7|CPSF3_MOUSE	78 kDa	0	0.12	0	0	0.13	0.016	0	0	0	0		0.12	0
212	TRUE	MOB kinase activator 1A OS=Mus musculus GN=Mob1a PE=1 SV=3	sp|Q921Y0|MOB1A_MOUSE	25 kDa	0	0	0	0.12	0	0	0	0	0	0		0.12	0
332	TRUE	Bromodomain-containing protein 7 OS=Mus musculus GN=Brd7 PE=1 SV=1	sp|O88665|BRD7_MOUSE	74 kDa	0	0.12	0	0	0	0	0	0	0	0		0.12	0
582	TRUE	Small ubiquitin-related modifier 1 OS=Mus musculus GN=Sumo1 PE=1 SV=1	sp|P63166|SUMO1_MOUSE	12 kDa	0	0.12	0	0	0	0	0	0	0	0		0.12	0
604	TRUE	Ig kappa chain V-V region T1 OS=Mus musculus PE=2 SV=1	sp|P01637|KV5A5_MOUSE	14 kDa	0	0	0	0.12	0	0	0	0	0	0		0.12	0
91	TRUE	Poly(U)-binding-splicing factor PUF60 OS=Mus musculus GN=Puf60 PE=2 SV=2	sp|Q3UEB3|PUF60_MOUSE	60 kDa	0	0.055	0.055	0	0.23	0.21	0	0	0	0		0.11	0
143	TRUE	Gelsolin OS=Mus musculus GN=Gsn PE=1 SV=3	sp|P13020|GELS_MOUSE	86 kDa	0	0.11	0	0	0.074	0.055	0	0	0	0		0.11	0
148	TRUE	Leucine-rich repeat flightless-interacting protein 2 OS=Mus musculus GN=Lrrfip2 PE=1 SV=1	sp|Q91WK0|LRRF2_MOUSE	47 kDa	0	0	0.11	0	0.031	0.17	0	0	0	0		0.11	0
156	TRUE	AT-rich interactive domain-containing protein 3B OS=Mus musculus GN=Arid3b PE=2 SV=1	sp|Q9Z1N7|ARI3B_MOUSE	61 kDa	0	0.11	0	0	0.067	0.032	0	0	0	0		0.11	0
225	TRUE	Eukaryotic initiation factor 4A-I OS=Mus musculus GN=Eif4a1 PE=2 SV=1	sp|P60843|IF4A1_MOUSE	46 kDa	0	0	0	0.11	0	0	0	0	0	0		0.11	0
311	TRUE	26S proteasome non-ATPase regulatory subunit 11 OS=Mus musculus GN=Psmd11 PE=1 SV=3	sp|Q8BG32|PSD11_MOUSE	47 kDa	0	0	0	0.11	0	0	0	0	0	0		0.11	0
394	TRUE	MAP3K12-binding inhibitory protein 1 OS=Mus musculus GN=Mbip PE=2 SV=1	sp|Q99LQ1|MBIP1_MOUSE	38 kDa	0	0	0	0.11	0	0	0	0	0	0		0.11	0
610	TRUE	Transcription initiation factor TFIID subunit 10 OS=Mus musculus GN=Taf10 PE=1 SV=1	sp|Q8K0H5|TAF10_MOUSE	22 kDa	0	0	0	0.11	0	0	0	0	0	0		0.11	0
168	TRUE	Histone-binding protein RBBP7 OS=Mus musculus GN=Rbbp7 PE=1 SV=1	sp|Q60973|RBBP7_MOUSE	48 kDa	0	0	0.038	0.064	0.024	0.064	0	0	0	0		0.102	0
149	TRUE	T-complex protein 1 subunit zeta-2 OS=Mus musculus GN=Cct6b PE=2 SV=4	sp|Q61390|TCPW_MOUSE	58 kDa	0	0.019	0.083	0	0.098	0.058	0	0	0.019	0		0.102	0.019
162	TRUE	Ran GTPase-activating protein 1 OS=Mus musculus GN=Rangap1 PE=1 SV=2	sp|P46061|RAGP1_MOUSE	64 kDa	0	0.1	0	0	0.02	0.02	0	0	0	0		0.1	0
207	TRUE	Integrator complex subunit 9 OS=Mus musculus GN=Ints9 PE=2 SV=1	sp|Q8K114|INT9_MOUSE	74 kDa	0	0.1	0	0	0	0	0	0	0	0		0.1	0
313	TRUE	Centrosomal protein of 55 kDa OS=Mus musculus GN=Cep55 PE=1 SV=2	sp|Q8BT07|CEP55_MOUSE	54 kDa	0	0	0.1	0	0	0	0	0	0	0		0.1	0
518	TRUE	Proteasome subunit alpha type-7-like OS=Mus musculus GN=Psma8 PE=2 SV=1	sp|Q9CWH6|PSA7L_MOUSE	28 kDa	0	0	0	0.1	0	0	0	0	0	0		0.1	0
605	TRUE	Ig kappa chain V-V region L7 (Fragment) OS=Mus musculus GN=Gm10881 PE=1 SV=1	sp|P01642|KV5A9_MOUSE	13 kDa	0	0	0	0.1	0	0	0	0	0	0		0.1	0
122	TRUE	Far upstream element-binding protein 2 OS=Mus musculus GN=Khsrp PE=1 SV=2	sp|Q3U0V1|FUBP2_MOUSE	77 kDa	0	0.1	0	0	0.1	0.048	0	0.012	0	0		0.1	0.012
113	TRUE	Polynucleotide 5'-hydroxyl-kinase NOL9 OS=Mus musculus GN=Nol9 PE=2 SV=1	sp|Q3TZX8|NOL9_MOUSE	81 kDa	0	0.1	0	0	0	0.02	0	0.02	0	0		0.1	0.02
174	TRUE	Nucleolar GTP-binding protein 1 OS=Mus musculus GN=Gtpbp4 PE=2 SV=3	sp|Q99ME9|NOG1_MOUSE	74 kDa	0	0.1	0	0	0	0	0	0.021	0	0		0.1	0.021
652	TRUE	Ig kappa chain V-III region PC 3741/TEPC 111 OS=Mus musculus PE=1 SV=1	sp|P01660|KV3A8_MOUSE	12 kDa	0	0	0	0.099	0	0	0	0	0	0		0.099	0
223	TRUE	WD repeat-containing protein 18 OS=Mus musculus GN=Wdr18 PE=2 SV=1	sp|Q4VBE8|WDR18_MOUSE	47 kDa	0	0	0	0.095	0	0	0	0	0	0		0.095	0
115	TRUE	Testis-expressed sequence 10 protein OS=Mus musculus GN=Tex10 PE=2 SV=1	sp|Q3URQ0|TEX10_MOUSE	105 kDa	0	0.095	0	0	0	0	0	0.014	0	0		0.095	0.014
131	TRUE	RNA-binding protein FUS OS=Mus musculus GN=Fus PE=2 SV=1	sp|P56959|FUS_MOUSE	53 kDa	0	0.031	0.064	0	0.087	0.064	0	0	0.031	0		0.095	0.031
606	TRUE	26S protease regulatory subunit 8 OS=Mus musculus GN=Psmc5 PE=1 SV=1	sp|P62196|PRS8_MOUSE	46 kDa	0	0	0.03	0.064	0.03	0.03	0	0	0	0		0.094	0
220	TRUE	Zinc finger and BTB domain-containing protein 24 OS=Mus musculus GN=Zbtb24 PE=1 SV=1	sp|Q80X44|ZBT24_MOUSE	79 kDa	0	0.093	0	0	0	0	0	0.018	0	0		0.093	0.018
351	TRUE	Eukaryotic initiation factor 4A-III OS=Mus musculus GN=Eif4a3 PE=2 SV=3	sp|Q91VC3|IF4A3_MOUSE	47 kDa	0	0	0	0.09	0	0	0	0	0	0		0.09	0
674	TRUE	ELL-associated factor 1 OS=Mus musculus GN=Eaf1 PE=1 SV=2	sp|Q9D4C5|EAF1_MOUSE	29 kDa	0	0	0	0.09	0	0	0	0	0	0		0.09	0
26	TRUE	Protein CBFA2T3 OS=Mus musculus GN=Cbfa2t3 PE=1 SV=2	sp|O54972|MTG16_MOUSE	68 kDa	0	0.089	0	0	0	0	0	0	0	0		0.089	0
110	TRUE	RNA polymerase II elongation factor ELL OS=Mus musculus GN=Ell PE=2 SV=2	sp|O08856|ELL_MOUSE	67 kDa	0	0.086	0	0	0.091	0.073	0	0	0	0		0.086	0
659	TRUE	Chromobox protein homolog 1 OS=Mus musculus GN=Cbx1 PE=1 SV=1	sp|P83917|CBX1_MOUSE	21 kDa	0	0	0	0.086	0	0	0	0	0	0		0.086	0
193	TRUE	Integrator complex subunit 11 OS=Mus musculus GN=Cpsf3l PE=2 SV=1	sp|Q9CWS4|INT11_MOUSE	68 kDa	0	0	0.083	0	0	0.03	0	0	0	0		0.083	0
506	TRUE	DDB1- and CUL4-associated factor 7 OS=Mus musculus GN=Dcaf7 PE=2 SV=1	sp|P61963|DCAF7_MOUSE	39 kDa	0	0	0	0.082	0	0	0	0	0	0		0.082	0
504	TRUE	Granzyme E OS=Mus musculus GN=Gzme PE=1 SV=1	sp|P08884|GRAE_MOUSE	27 kDa	0	0	0.081	0	0	0	0	0	0	0		0.081	0
613	TRUE	General transcription factor IIF subunit 2 OS=Mus musculus GN=Gtf2f2 PE=1 SV=1	sp|Q8R0A0|T2FB_MOUSE	28 kDa	0	0	0	0.08	0	0	0	0	0	0		0.08	0
119	TRUE	Cleavage stimulation factor subunit 2 OS=Mus musculus GN=Cstf2 PE=1 SV=2	sp|Q8BIQ5|CSTF2_MOUSE	61 kDa	0	0.06	0.019	0	0.15	0.11	0	0	0	0		0.079	0
509	TRUE	Proteasome subunit alpha type-3 OS=Mus musculus GN=Psma3 PE=1 SV=3	sp|O70435|PSA3_MOUSE	28 kDa	0	0	0	0.078	0	0	0	0	0	0		0.078	0
597	TRUE	Alpha-enolase OS=Mus musculus GN=Eno1 PE=1 SV=3	sp|P17182|ENOA_MOUSE	47 kDa	0	0	0	0.078	0	0	0	0	0	0		0.078	0
476	TRUE	H/ACA ribonucleoprotein complex non-core subunit NAF1 OS=Mus musculus GN=Naf1 PE=1 SV=2	sp|Q3UMQ8|NAF1_MOUSE	53 kDa	0	0.057	0.02	0	0	0	0	0	0	0		0.077	0
656	TRUE	Pancreas/duodenum homeobox protein 1 OS=Mus musculus GN=Pdx1 PE=1 SV=1	sp|P52946|PDX1_MOUSE	31 kDa	0	0	0	0.077	0	0	0	0	0	0		0.077	0
762	TRUE	UPF0471 protein C1orf63 homolog OS=Mus musculus GN=D4Wsu53e PE=1 SV=1	sp|Q3UC65|CA063_MOUSE	35 kDa	0	0	0	0.077	0	0	0	0	0	0		0.077	0
52	TRUE	Probable helicase senataxin OS=Mus musculus GN=Setx PE=2 SV=1	sp|A2AKX3|SETX_MOUSE	298 kDa	0.0064	0.033	0.018	0.019	0.014	0.0098	0.0091	0	0	0		0.0764	0.0091
675	TRUE	Protein C20orf11 homolog OS=Mus musculus PE=2 SV=1	sp|Q9D7M1|CT011_MOUSE	27 kDa	0	0	0	0.075	0	0	0	0	0	0		0.075	0
35	TRUE	Rho GTPase-activating protein 42 OS=Mus musculus GN=Arhgap42 PE=2 SV=1	sp|B2RQE8|RHG42_MOUSE	95 kDa	0	0.075	0	0	0.25	0.14	0	0.012	0	0		0.075	0.012
150	TRUE	Cleavage and polyadenylation specificity factor subunit 6 OS=Mus musculus GN=Cpsf6 PE=1 SV=1	sp|Q6NVF9|CPSF6_MOUSE	59 kDa	0	0.074	0	0	0.12	0.12	0	0	0	0		0.074	0
453	TRUE	26S protease regulatory subunit 6B OS=Mus musculus GN=Psmc4 PE=1 SV=2	sp|P54775|PRS6B_MOUSE	47 kDa	0	0	0	0.072	0	0	0	0	0	0		0.072	0
434	TRUE	SAP30-binding protein OS=Mus musculus GN=Sap30bp PE=2 SV=2	sp|Q02614|S30BP_MOUSE	34 kDa	0	0	0	0.071	0	0	0	0	0	0		0.071	0
201	TRUE	Cell cycle regulator Mat89Bb homolog OS=Mus musculus PE=2 SV=2	sp|Q8QZV7|M89BB_MOUSE	83 kDa	0	0.07	0	0	0	0	0	0	0	0		0.07	0
607	TRUE	Proteasome subunit beta type-7 OS=Mus musculus GN=Psmb7 PE=1 SV=1	sp|P70195|PSB7_MOUSE	30 kDa	0	0	0	0.069	0	0	0	0	0	0		0.069	0
772	TRUE	Protein NipSnap homolog 3A OS=Mus musculus GN=Nipsnap3a PE=1 SV=1	sp|Q9CQE1|NPS3A_MOUSE	28 kDa	0	0.069	0	0	0	0	0	0	0	0		0.069	0
455	TRUE	Keratin, type I cytoskeletal 16 OS=Mus musculus GN=Krt16 PE=1 SV=3	sp|Q9Z2K1|K1C16_MOUSE	52 kDa	0	0	0	0.068	0	0	0	0	0	0		0.068	0
591	TRUE	RNA-binding protein with multiple splicing 2 OS=Mus musculus GN=Rbpms2 PE=1 SV=1	sp|Q8VC52|RBPS2_MOUSE	22 kDa	0	0	0	0.068	0	0	0	0	0	0		0.068	0
61	TRUE	Eukaryotic translation initiation factor 3 subunit L OS=Mus musculus GN=Eif3l PE=1 SV=1	sp|Q8QZY1|EIF3L_MOUSE	67 kDa	0	0	0.067	0	0.2	0.18	0	0	0	0		0.067	0
508	TRUE	Pre-mRNA-splicing factor SLU7 OS=Mus musculus GN=Slu7 PE=1 SV=1	sp|Q8BHJ9|SLU7_MOUSE	68 kDa	0	0.067	0	0	0	0	0	0	0	0		0.067	0
132	TRUE	HAUS augmin-like complex subunit 5 OS=Mus musculus GN=Haus5 PE=2 SV=1	sp|Q9D786|HAUS5_MOUSE	70 kDa	0	0.065	0	0	0.09	0.037	0	0	0	0		0.065	0
541	TRUE	Suppressor of G2 allele of SKP1 homolog OS=Mus musculus GN=Sugt1 PE=2 SV=3	sp|Q9CX34|SUGT1_MOUSE	38 kDa	0	0	0	0.065	0	0	0	0	0	0		0.065	0
665	TRUE	60S ribosomal protein L10 OS=Mus musculus GN=Rpl10 PE=2 SV=3	sp|Q6ZWV3|RL10_MOUSE	25 kDa	0	0	0	0.065	0	0	0	0	0	0		0.065	0
324	TRUE	26S proteasome non-ATPase regulatory subunit 4 OS=Mus musculus GN=Psmd4 PE=1 SV=1	sp|O35226|PSMD4_MOUSE	41 kDa	0	0	0.032	0.032	0	0.032	0	0	0	0		0.064	0
717	TRUE	Glycine N-acyltransferase-like protein OS=Mus musculus GN=Gm4952 PE=1 SV=2	sp|Q5FW57|GLYAL_MOUSE	34 kDa	0	0.064	0	0	0	0	0	0	0	0		0.064	0
731	TRUE	RNA and export factor-binding protein 2 OS=Mus musculus GN=Refbp2 PE=1 SV=1	sp|Q9JJW6|REFP2_MOUSE	24 kDa	0	0.064	0	0	0	0	0	0	0	0		0.064	0
158	TRUE	Myotubularin-related protein 14 OS=Mus musculus GN=Mtmr14 PE=2 SV=2	sp|Q8VEL2|MTMRE_MOUSE	72 kDa	0	0.063	0	0	0	0.1	0	0	0	0		0.063	0
272	TRUE	Lamina-associated polypeptide 2, isoforms alpha/zeta OS=Mus musculus GN=Tmpo PE=1 SV=4	sp|Q61033|LAP2A_MOUSE	75 kDa	0	0.063	0	0	0	0.017	0	0	0	0		0.063	0
551	TRUE	Uncharacterized protein C12orf70 homolog OS=Mus musculus PE=2 SV=1	sp|Q9DA21|CL070_MOUSE	39 kDa	0	0	0.063	0	0	0	0	0	0	0		0.063	0
699	TRUE	UPF0361 protein C3orf37 homolog OS=Mus musculus PE=2 SV=1	sp|Q8R1M0|CC037_MOUSE	40 kDa	0	0	0	0.062	0	0	0	0	0	0		0.062	0
519	TRUE	Spliceosome RNA helicase Ddx39b OS=Mus musculus GN=Ddx39b PE=1 SV=1	sp|Q9Z1N5|DX39B_MOUSE	49 kDa	0	0	0	0.061	0	0	0	0	0	0		0.061	0
263	TRUE	Nuclear pore complex protein Nup50 OS=Mus musculus GN=Nup50 PE=1 SV=3	sp|Q9JIH2|NUP50_MOUSE	49 kDa	0	0	0.06	0	0.028	0.06	0	0	0	0		0.06	0
527	TRUE	Proteasome subunit alpha type-7 OS=Mus musculus GN=Psma7 PE=1 SV=1	sp|Q9Z2U0|PSA7_MOUSE	28 kDa	0	0	0	0.06	0	0	0	0	0	0		0.06	0
581	TRUE	DnaJ homolog subfamily A member 1 OS=Mus musculus GN=Dnaja1 PE=1 SV=1	sp|P63037|DNJA1_MOUSE	45 kDa	0	0	0	0.06	0	0	0	0	0	0		0.06	0
651	TRUE	Ig kappa chain V19-17 OS=Mus musculus GN=Igk-V19-17 PE=1 SV=1	sp|P01633|KV5A1_MOUSE	16 kDa	0	0	0	0.06	0	0	0	0	0	0		0.06	0
231	TRUE	ATP-dependent RNA helicase DDX3X OS=Mus musculus GN=Ddx3x PE=1 SV=3	sp|Q62167|DDX3X_MOUSE	73 kDa	0	0.059	0	0	0.041	0.015	0	0	0	0		0.059	0
792	TRUE	Growth arrest and DNA damage-inducible proteins-interacting protein 1 OS=Mus musculus GN=Gadd45gip1 PE=2 SV=1	sp|Q9CR59|G45IP_MOUSE	26 kDa	0	0.059	0	0	0	0	0	0	0	0		0.059	0
577	TRUE	Proteasome subunit beta type-1 OS=Mus musculus GN=Psmb1 PE=1 SV=1	sp|O09061|PSB1_MOUSE	26 kDa	0	0	0	0.058	0	0	0	0	0	0		0.058	0
626	TRUE	RNA binding protein fox-1 homolog 2 OS=Mus musculus GN=Rbfox2 PE=1 SV=2	sp|Q8BP71|RFOX2_MOUSE	47 kDa	0	0	0.058	0	0	0	0	0	0	0		0.058	0
421	TRUE	14-3-3 protein gamma OS=Mus musculus GN=Ywhag PE=1 SV=2	sp|P61982|1433G_MOUSE	28 kDa	0	0	0	0.057	0	0	0	0	0	0		0.057	0
512	TRUE	Microfibrillar-associated protein 1 OS=Mus musculus GN=Mfap1 PE=1 SV=1	sp|Q9CQU1|MFAP1_MOUSE	52 kDa	0	0.057	0	0	0	0	0	0	0	0		0.057	0
676	TRUE	Phosphoglycerate mutase 1 OS=Mus musculus GN=Pgam1 PE=1 SV=3	sp|Q9DBJ1|PGAM1_MOUSE	29 kDa	0	0	0	0.055	0	0	0	0	0	0		0.055	0
653	TRUE	60S ribosomal protein L13a OS=Mus musculus GN=Rpl13a PE=1 SV=4	sp|P19253|RL13A_MOUSE	23 kDa	0	0	0	0.054	0	0	0	0	0	0		0.054	0
670	TRUE	Ubiquitin-conjugating enzyme E2 S OS=Mus musculus GN=Ube2s PE=2 SV=1	sp|Q921J4|UBE2S_MOUSE	24 kDa	0	0	0	0.054	0	0	0	0	0	0		0.054	0
173	TRUE	Anaphase-promoting complex subunit 5 OS=Mus musculus GN=Anapc5 PE=2 SV=1	sp|Q8BTZ4|APC5_MOUSE	83 kDa	0	0.053	0	0	0.015	0.015	0	0	0	0		0.053	0
624	TRUE	Tubulin alpha-1C chain OS=Mus musculus GN=Tuba1c PE=1 SV=1	sp|P68373|TBA1C_MOUSE	50 kDa	0	0	0.053	0	0	0	0	0	0	0		0.053	0
667	TRUE	Transcription initiation factor TFIID subunit 9 OS=Mus musculus GN=Taf9 PE=2 SV=1	sp|Q8VI33|TAF9_MOUSE	29 kDa	0	0	0	0.053	0	0	0	0	0	0		0.053	0
672	TRUE	Cleavage and polyadenylation specificity factor subunit 5 OS=Mus musculus GN=Nudt21 PE=2 SV=1	sp|Q9CQF3|CPSF5_MOUSE	26 kDa	0	0	0	0.053	0	0	0	0	0	0		0.053	0
164	TRUE	WD and tetratricopeptide repeats protein 1 OS=Mus musculus GN=Wdtc1 PE=1 SV=1	sp|Q80ZK9|WDTC1_MOUSE	76 kDa	0	0.052	0	0	0.034	0.021	0	0	0	0		0.052	0
736	TRUE	Coproporphyrinogen-III oxidase, mitochondrial OS=Mus musculus GN=Cpox PE=1 SV=2	sp|P36552|HEM6_MOUSE	50 kDa	0	0	0	0.052	0	0	0	0	0	0		0.052	0
340	TRUE	Ran-binding protein 9 OS=Mus musculus GN=Ranbp9 PE=1 SV=1	sp|P69566|RANB9_MOUSE	71 kDa	0	0.051	0	0	0	0	0	0	0	0		0.051	0
658	TRUE	Casein kinase II subunit beta OS=Mus musculus GN=Csnk2b PE=1 SV=1	sp|P67871|CSK2B_MOUSE	25 kDa	0	0	0	0.051	0	0	0	0	0	0		0.051	0
662	TRUE	GTP-binding nuclear protein Ran, testis-specific isoform OS=Mus musculus GN=Rasl2-9 PE=2 SV=1	sp|Q61820|RANT_MOUSE	24 kDa	0	0	0	0.051	0	0	0	0	0	0		0.051	0
329	TRUE	HAUS augmin-like complex subunit 3 OS=Mus musculus GN=Haus3 PE=2 SV=1	sp|Q8QZX2|HAUS3_MOUSE	66 kDa	0	0.025	0.025	0	0.025	0	0	0	0	0		0.05	0
END OF FILE
