# Supplementary material for: ETO family protein Mtgr1 mediates Prdm14 functions in stem cell maintenance and primordial germ cell formation
Source: eLife journal article supplement (doi:10.7554/elife.10150), 2015-11-02

**A**

Fold change expression (wt EB, d4 relative to wt mESC)

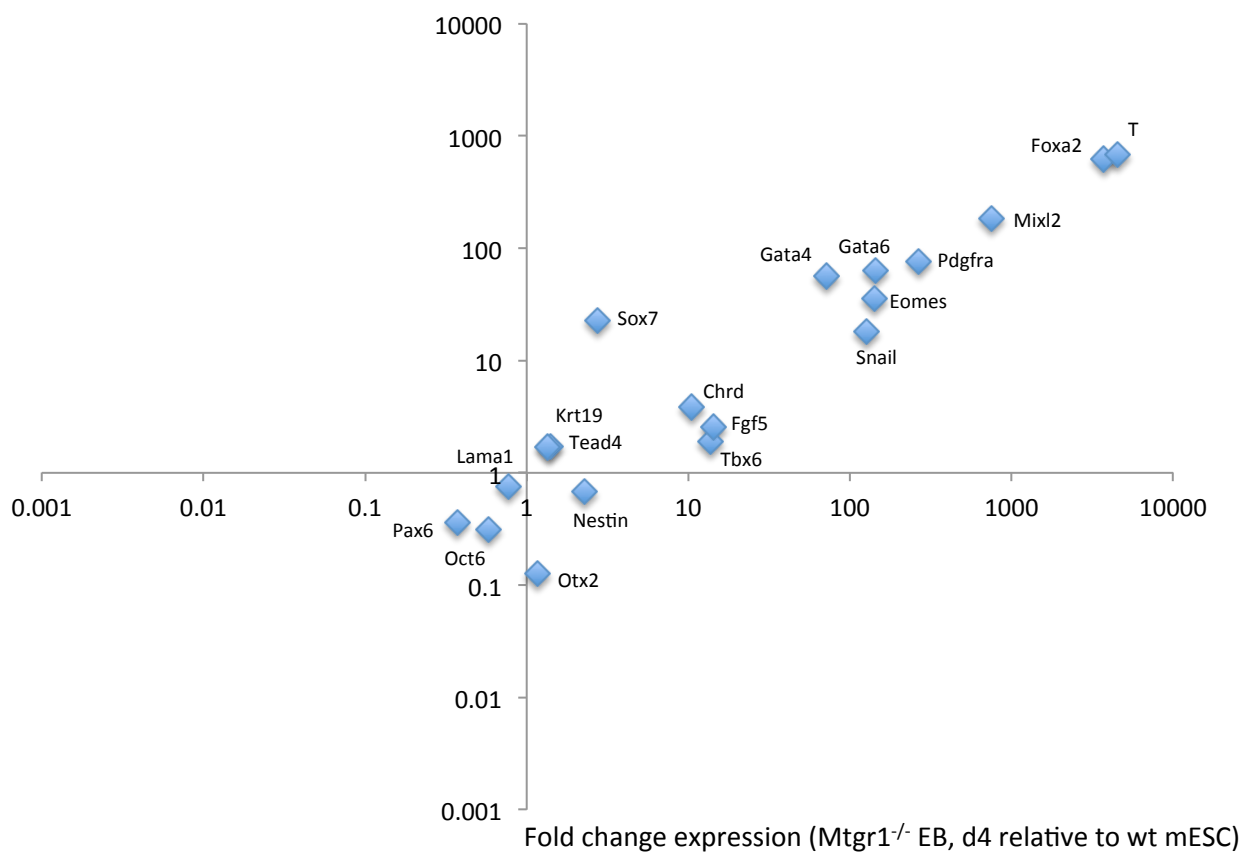**B**

Fold change expression (wt EB, d8 relative to wt mESC)

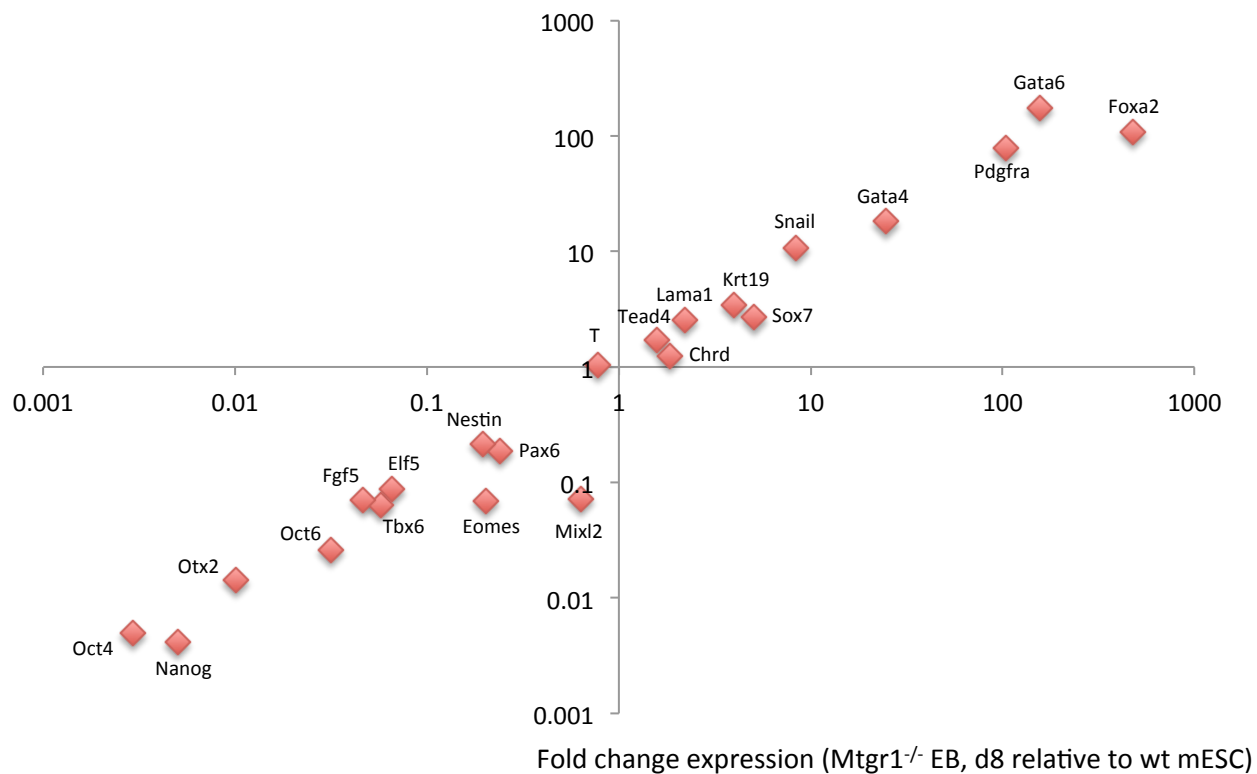

Supplement: supp [file elife-10150-supp-v1.zip]
