# Supplementary material for: ETO family protein Mtgr1 mediates Prdm14 functions in stem cell maintenance and primordial germ cell formation
Source: eLife journal article supplement (doi:10.7554/elife.10150), 2015-11-02
Supplement: supp [file elife-10150-supp-v1.zip]

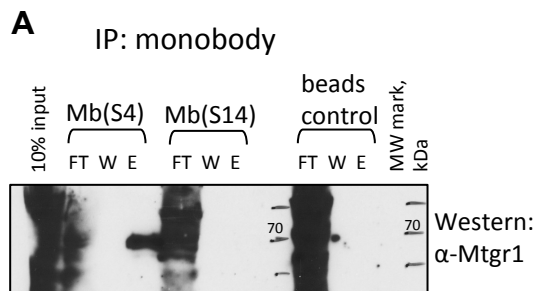

**B** Mb(S4) monobody pulldown

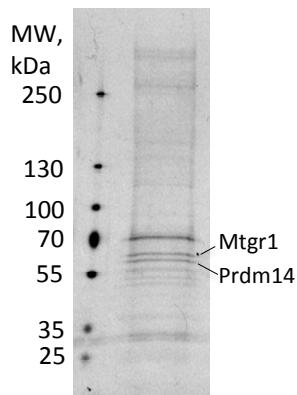

**C**

| Protein             | Prob   | Intensity | Spectra | UPep | Coverage | #AA's |
|---------------------|--------|-----------|---------|------|----------|-------|
| >sp Q60974 Ncor1    | 131.01 | 4661089.9 | 55      | 40   | 16.67    | 2453  |
| >tr Ncor2           | 92.84  | 1157303.6 | 45      | 30   | 10.97    | 2507  |
| >sp Q5SWU9 Acaca    | 87.65  | 2923186.0 | 40      | 30   | 11.56    | 2345  |
| >sp Q80U93 Nup214   | 67.66  | 1491427.0 | 31      | 20   | 10.65    | 2085  |
| >tr A2AIX1 Sec16a   | 53.03  | 1994295.6 | 26      | 19   | 9.09     | 2377  |
| >sp Q69ZK6 Jmjd1c   | 47.31  | 927257.3  | 32      | 20   | 8.98     | 2350  |
| >sp Q6DFV5 Helz     | 44.49  | 599228.4  | 20      | 15   | 8.10     | 1964  |
| >sp Q8VDM6 Hnrnpul1 | 41.47  | 571288.9  | 21      | 12   | 14.44    | 859   |
| >sp Q3U3C9 Gse1     | 36.60  | 2240891.6 | 21      | 14   | 12.04    | 1213  |
| >sp Q4JK59 Tet2     | 36.39  | 469727.0  | 17      | 15   | 8.53     | 1912  |
| >sp P63017 Hspa8    | 32.52  | 313124.2  | 15      | 11   | 19.20    | 646   |
| >tr A2A468 Ncoa3    | 29.18  | 634849.8  | 13      | 9    | 8.49     | 1402  |
| >sp Q8CGY8 Ogt      | 19.93  | 455381.5  | 8       | 7    | 7.46     | 1046  |
| >sp Q6ZQ88 Kdm1a    | 19.77  | 1007791.0 | 8       | 7    | 11.25    | 853   |
| >sp Q8CGZ0 Cherp    | 18.65  | 553513.3  | 11      | 10   | 7.59     | 936   |
| >sp Q99MR8 Mccc1    | 17.12  | 257034.1  | 6       | 6    | 11.58    | 717   |
| >tr Q3U3X7 Trim25   | 16.14  | 218187.6  | 5       | 4    | 6.94     | 634   |
| >sp Q9QXE7 Tbl1x    | 15.84  | 270694.9  | 5       | 4    | 11.39    | 527   |
| >sp Q8JZX4 Rbm17    | 12.22  | 1132378.6 | 8       | 6    | 14.32    | 405   |
| >sp Q8BHJ5 Tbl1r    | 11.30  | 779759.7  | 8       | 4    | 12.65    | 514   |
| >tr Q3UJB0 Sf3b2    | 11.26  | 111875.1  | 5       | 4    | 4.78     | 878   |
| >sp Q91VX2 Ubp2     | 10.77  | 26610.6   | 4       | 3    | 3.18     | 1132  |
| >sp B7ZNG0 Kif7     | 10.49  | 63432.5   | 5       | 4    | 2.60     | 1348  |
| >sp Q70374 Mtgr1    | 10.40  | 402481.0  | 7       | 5    | 7.58     | 594   |
| >sp Q99NB9 Sf3b1    | 10.19  | 36173.6   | 4       | 4    | 3.83     | 1304  |
| >sp Q8CH18 Ccar1    | 9.84   | 104382.2  | 6       | 5    | 3.58     | 1146  |
| >sp O88895 Hdac3    | 9.11   | 301079.7  | 8       | 4    | 8.96     | 424   |
| >sp Q8K389 Cdk5rap2 | 8.49   | 58575.2   | 4       | 4    | 2.69     | 1822  |
| >tr E9Q842 Nav2     | 8.38   | 90602.6   | 5       | 3    | 1.23     | 2432  |
| >sp P48725 Pcnt     | 8.33   | 422111.5  | 6       | 6    | 2.31     | 2898  |
| >sp Q05920 Pyc      | 8.31   | 139998.8  | 7       | 5    | 3.82     | 1178  |
| >sp P99024 Tubb5    | 8.25   | 449296.1  | 3       | 3    | 7.43     | 444   |
| >tr A2BIE1 Qser1    | 7.64   | 16068.2   | 4       | 4    | 3.06     | 1698  |
| >sp Q8CFE3 Rcor1    | 7.09   | 32056.1   | 1       | 1    | 3.35     | 477   |
| >sp Q9DBR0 Akap8    | 6.41   | 36305.5   | 5       | 3    | 5.09     | 687   |
| >sp E9Q3T6 Prdm14   | 6.33   | 99325.0   | 4       | 3    | 4.81     | 561   |
| >sp Q3ULD5 Mccc2    | 6.00   | 45715.6   | 2       | 2    | 4.09     | 563   |
| >sp Q99PJ2 Trim8    | 5.74   | 67964.7   | 4       | 3    | 4.54     | 551   |
| >sp Q3U0V1 Khshp    | 5.16   | 27278.1   | 1       | 1    | 1.87     | 748   |
| >sp Q8C796 Rcor2    | 5.15   | 33583.7   | 5       | 3    | 5.54     | 523   |
| >sp P57784 Snrpa1   | 5.01   | 35408.5   | 1       | 1    | 5.49     | 255   |
| >sp Q61495 Dsg1a    | 5.01   | 24500.5   | 1       | 1    | 1.23     | 1057  |
