# Supplementary material for: ETO family protein Mtgr1 mediates Prdm14 functions in stem cell maintenance and primordial germ cell formation
Source: eLife journal article supplement (doi:10.7554/elife.10150), 2015-11-02
Supplement: supp [file elife-10150-supp-v1.zip]

Supplementary Table 2. Sequences of monobodies selected against human PRDM14 and their  $K_D$  values to hPRDM14 measured in yeast display format.

| Clone        | Kd(nM) | Amino acid sequence                                                                                                                                                                  |
|--------------|--------|--------------------------------------------------------------------------------------------------------------------------------------------------------------------------------------|
|              |        | <div> <div>10</div> <div>20</div> <div>BC</div> <div>30</div> <div>40</div> <div>50</div> <div>DE</div> <div>60</div> <div>70</div> <div>FG</div> <div>80</div> <div>90</div> </div> |
| Loop Library |        | VSSVPTKLEVVAATPTSLISWDA(X <sub>4-8</sub> )-VYYRITYGETGGNSPVQEFTPVBJJJTATISGLSPGVDYTTITVYA(X <sub>7-13</sub> )-----SPISINVRT                                                          |
| L3           | 51     | VSSVPTKLEVVAATPTSLISWDA <b>GGYY</b> --VYYRITYGETGGNSRVQEFTPV <b>SSS</b> STATISGLKPGVDYTITVYA <b>WDWEDWYWFYY</b> -----SPISINVRT                                                       |
| L5           | 93     | VSSVPTKLEVVAATPTSLISWDA <b>SSSS</b> --VYYRITYGETGGNSPVQEFTPV <b>SSS</b> STATISGLSPGVDYTITVYA <b>YYYQGGSWV</b> -----SPISINVRT                                                         |
| L7           | 10     | VSSVPTKLEVVAATPTSLISWDA <b>SSSS</b> --VYYRITYGETGGNSPVQEFTPV <b>SSS</b> STATISGLKPGVDYTITVYA <b>YYWGYSRVY</b> -----SPISINVRT                                                         |
| L9           | 125    | VSSVPTKLEVVAATPTSLISWDA <b>GWYE</b> --VYYRITYGETGGNSPVQEFTPV <b>SSS</b> STATISGLKPGVDYTITVYA <b>WQWRYYY</b> ----- <b>NP</b> ISINVRT                                                  |
| L13          | 150    | VSSVPTKLEVVAATPTSLISWDA <b>NSYS</b> --VYYRITYGETGGNSPVQEFTPV <b>YYY</b> STATISGLKPGVDYTITVYA <b>YSYYWPGYY</b> -----SPISINVRT                                                         |
| L15          | 89     | VSSVPTKLEVVAATPTSLISWDA <b>PGGPPY</b> NYYRITYGETGGNSPVQEFTPV <b>YYY</b> STATISGLKPGVDYTITVYA <b>SSSPWYSY</b> -----SPISINVRT                                                          |

| Clone        | Kd(nM) | Amino acid sequence                                                                                                                                    |
|--------------|--------|--------------------------------------------------------------------------------------------------------------------------------------------------------|
|              |        | <div> <div>1020βC40CDβD506070FG90</div> <div></div> </div>                                                                                             |
| Side Library |        | VSSVPTKLEVVAAATPTSLISWDAPAVTVOUY <sup>1</sup> OITYGETGGNSPVQZF <sup>2</sup> ZVPGSKSTATISGLSPGVDTITVYA(X <sub>7-13</sub> )-----SPISINYRT                |
| S14          | 63     | VSSVPTKLEVVAAATPTSLISWDAPAVTVDHY <sup>1</sup> RITYGETGVGSYYHQEF <sup>2</sup> TPVGSKSTATISGLSPGVDTITTVYAVGWWYPGWHGYTRS <sup>3</sup> SPISINYRT           |
| S4           | 85     | VSSVPTKLEVVAATPTSLISWDAPAVTVVLY <sup>1</sup> HITYGETGGNSPV-QEF <sup>2</sup> TPVGSKSTATISGLSPGVDTITTVYATYRLWGSQWYYYS <sup>3</sup> SPISINYRT             |
| S10          | 59     | VSSVPTKLEVVAATPTSLISWDAPAVTVVYY <sup>1</sup> HITYGETGGNSPV-QAF <sup>2</sup> KVPGSKSTATISGLSPGVDTITTVYATYRLWGSQWYYYS <sup>3</sup> SPISINYRT             |
| S3           | 38     | VSSVPTKLEVVAAATPTSLISWDAPAVTVHFY <sup>1</sup> FITYGETGVYGAGPQAF <sup>2</sup> KVPGSKSTATISGLSPGVDTITTVYARRHYHPGGYY---SPISINYRT                          |
| S9           | 69     | VSSVPTKLEVVAATPTSLISWDAPAVTVDHY <sup>1</sup> VITYGETGSYGYWQEF <sup>2</sup> TPVGSKSTATISGLKPGVDYITTVYAVGWWYPGWHGYTRS <sup>3</sup> SPISINYRT             |
| S5           | 100    | VSSVPTKLEVVAATPTSLISWDAPAVTVIFVY <sup>1</sup> VITYGETGGNSPV-QAF <sup>2</sup> KVPGSKSTATISGLKPGVDYITTVYAVQGYQSRWYRN---SPISINYRT                         |
| S2           | 76     | VSSVPTKLEVVAAATPTSLISWDAPAVTVDHY <sup>1</sup> VITYGETGGNSPV-QEF <sup>2</sup> TPVGSKSTATISGLKPGVDYITTVYAGHFWYGYQYW---SPISINYRT                          |
| S14-1        | 73     | VSSVPTKLEVVAATPTSLISWDAPAVTVDHY <sup>1</sup> LITYGETGGNSPV-QEF <sup>2</sup> TPVGSKSTATISGLKPGVDYITTVYATQYDGDGWL <sup>3</sup> SA <sup>3</sup> SPISINYRT |
