# Supplementary material for: ETO family protein Mtgr1 mediates Prdm14 functions in stem cell maintenance and primordial germ cell formation
Source: eLife journal article supplement (doi:10.7554/elife.10150), 2015-11-02

# A

## R correlation coefficient values for Mtgr1 and Prdm14 ChIP-seq signals

| Lines                                | Mtgr1 ChIP-seq in FH-Prdm14, clone1 | Mtgr1 ChIP-seq in FH-Prdm14, clone2 | Prdm14 ChIP-seq in FH-Prdm14, clone1 | Prdm14 ChIP-seq in FH-Prdm14, clone2 |
|--------------------------------------|-------------------------------------|-------------------------------------|--------------------------------------|--------------------------------------|
| Mtgr1 ChIP-seq in FH-Prdm14, clone1  | 1                                   | 0.92                                | 0.87                                 | 0.87                                 |
| Mtgr1 ChIP-seq in FH-Prdm14, clone2  | 0.92                                | 1                                   | 0.88                                 | 0.90                                 |
| Prdm14 ChIP-seq in FH-Prdm14, clone1 | 0.87                                | 0.88                                | 1                                    | 0.90                                 |
| Prdm14 ChIP-seq in FH-Prdm14, clone2 | 0.87                                | 0.90                                | 0.90                                 | 1                                    |

# B

## Mtgr1 ChIP-seq Functional Annotation

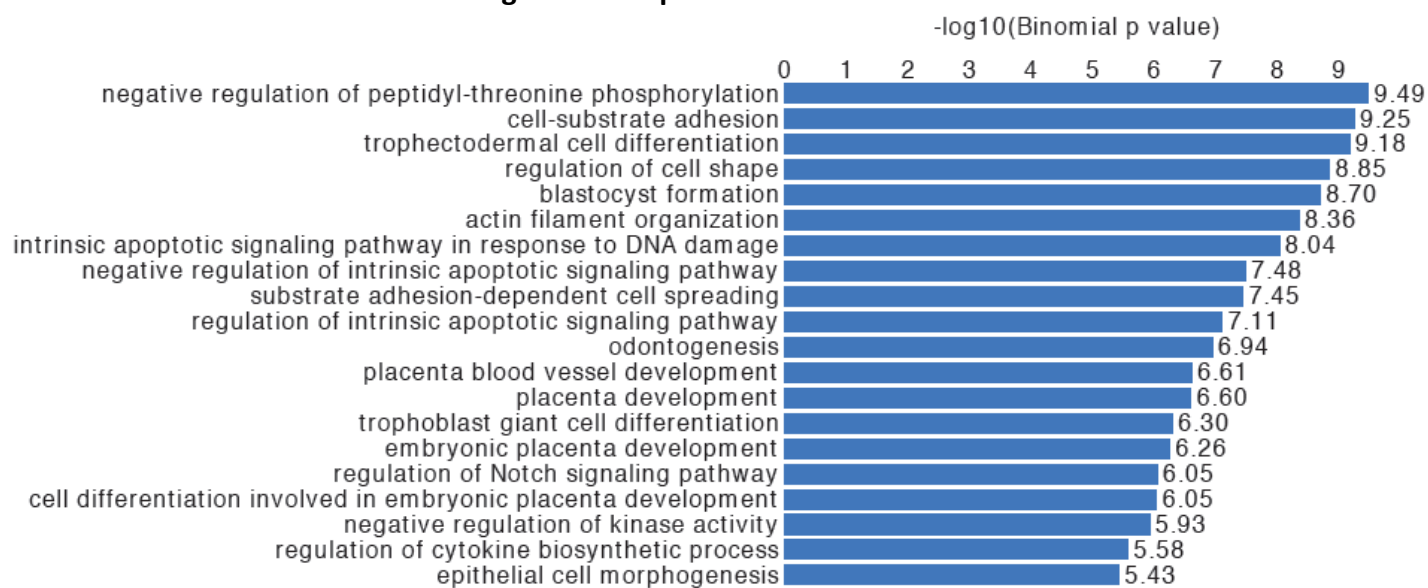

Supplement: supp [file elife-10150-supp-v1.zip]
