# Supplementary figures and images for: ETO family protein Mtgr1 mediates Prdm14 functions in stem cell maintenance and primordial germ cell formation
Source: eLife journal article supplement (doi:10.7554/elife.10150), 2015-11-02

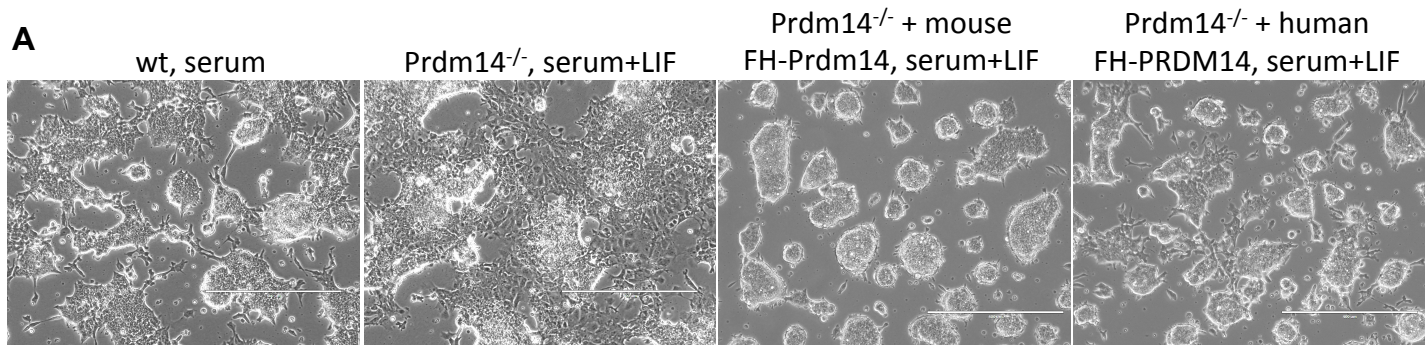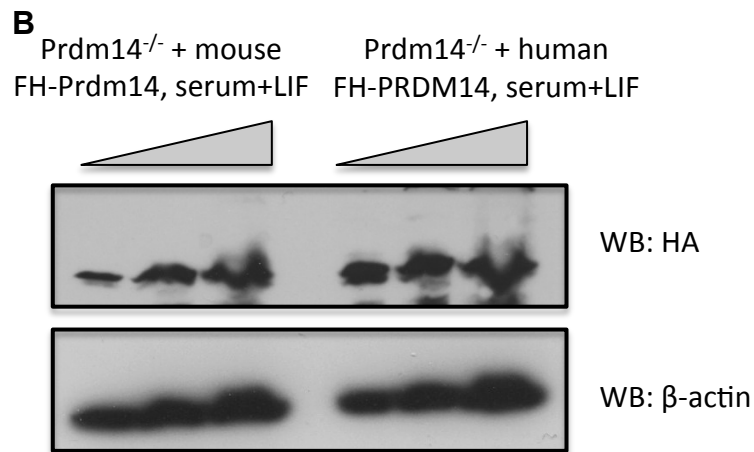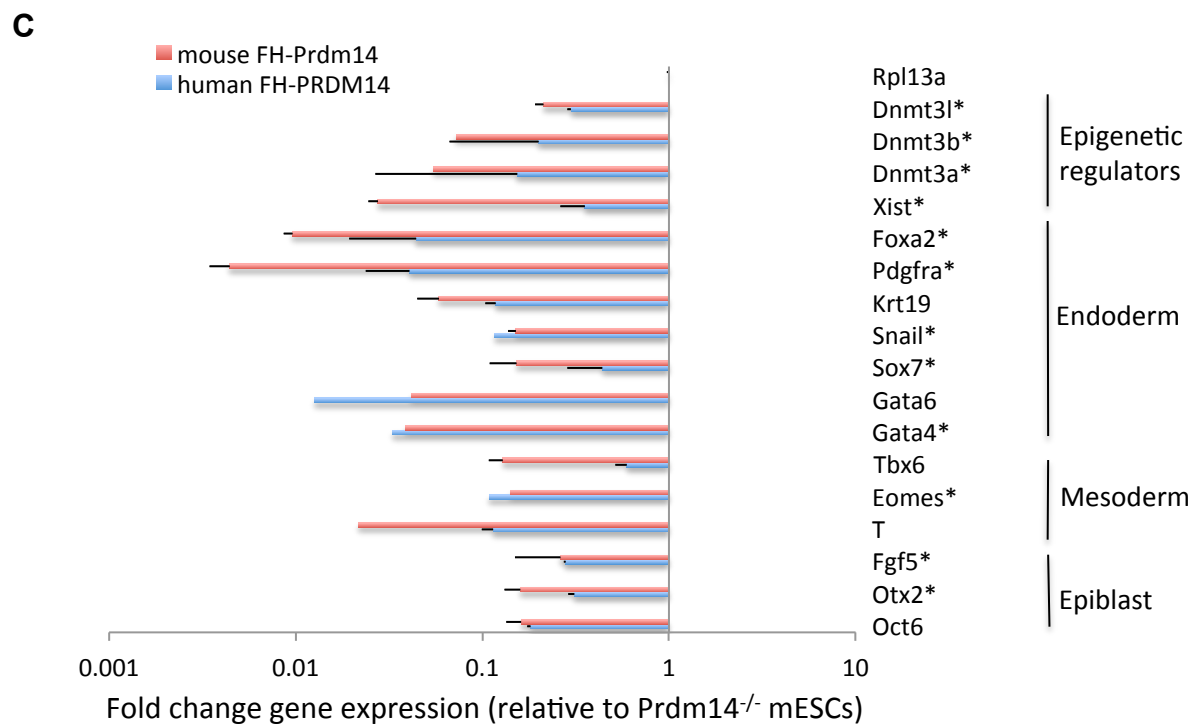

Supplement: supp [file elife-10150-supp-v1.zip]

**Mtgr1**

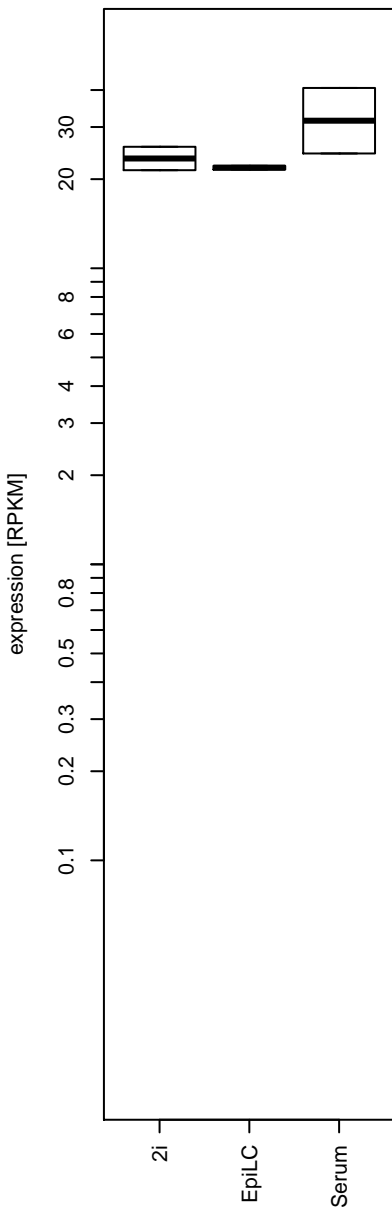

**Mtg8**

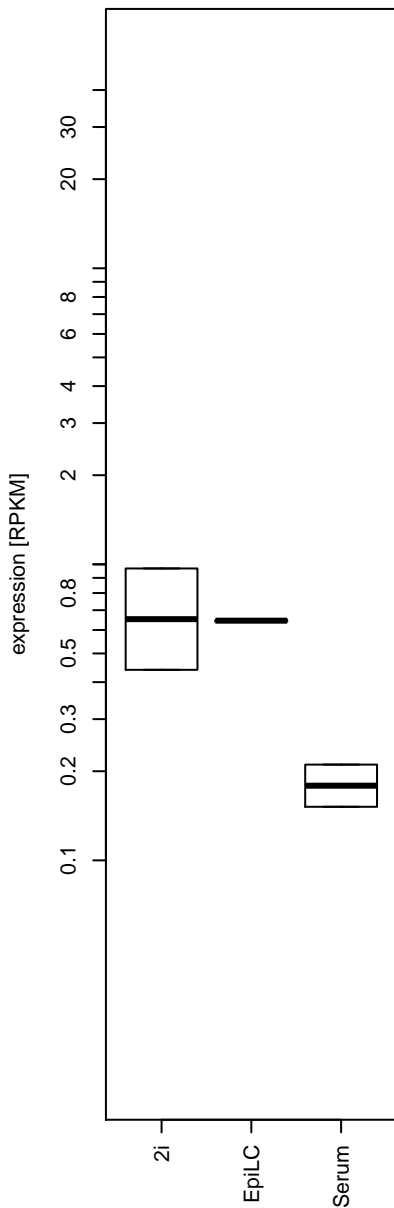

**Mtg16**

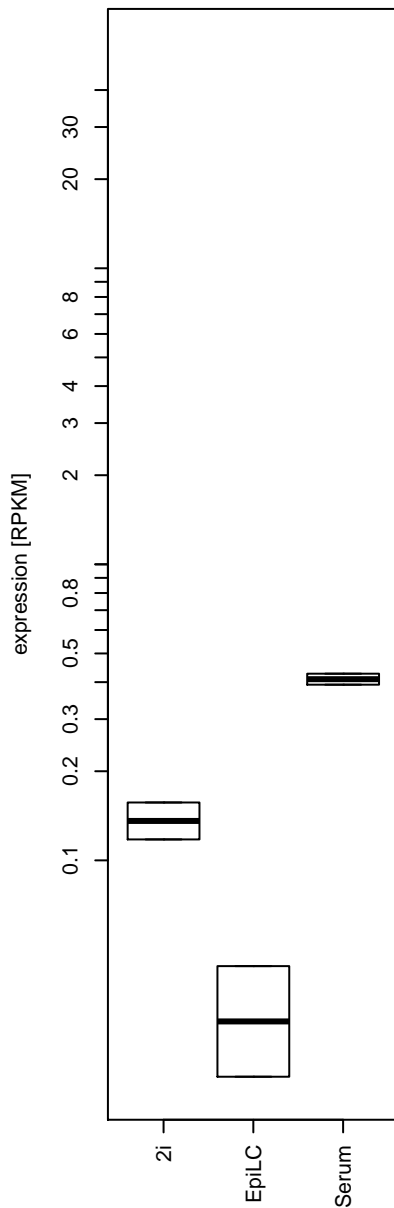

Supplement: supp [file elife-10150-supp-v1.zip]

**A**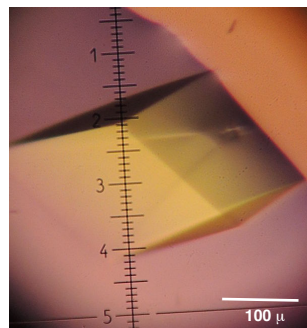**B**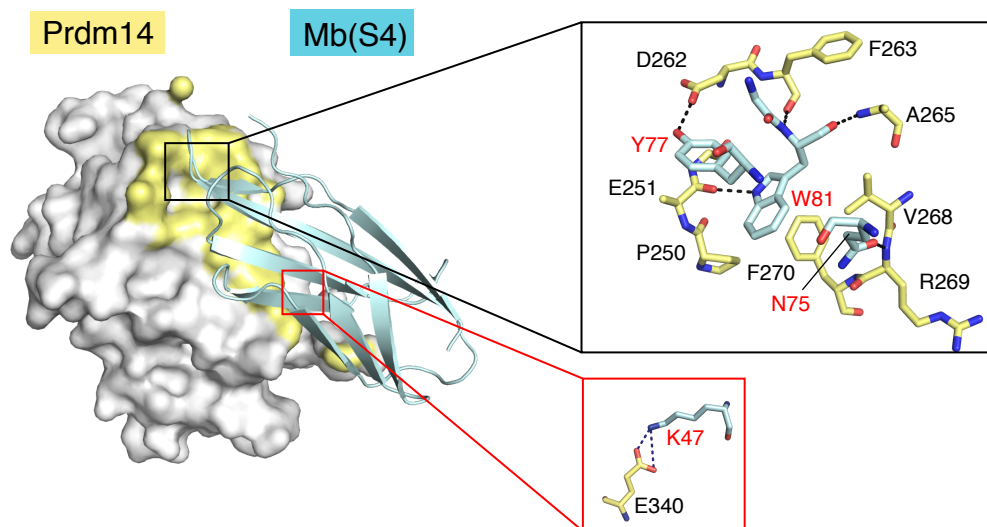**C**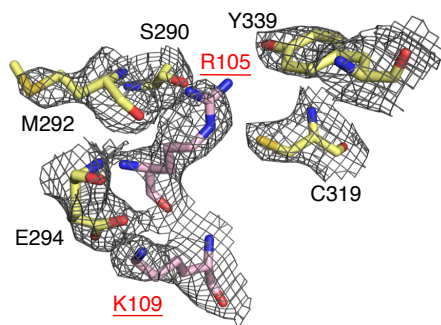**D**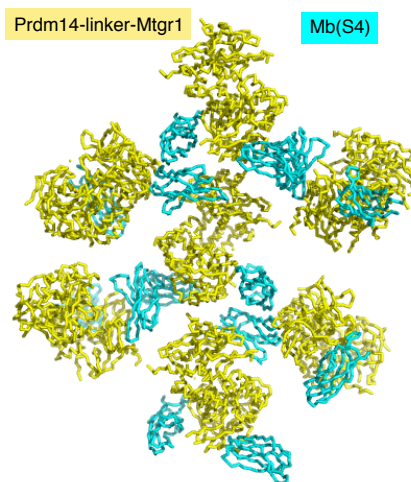**E**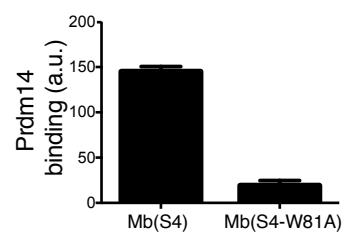

Supplement: supp [file elife-10150-supp-v1.zip]

wt, 2i+LIF

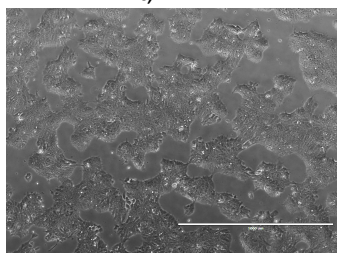

*Prdm14*<sup>-/-</sup>, clone2

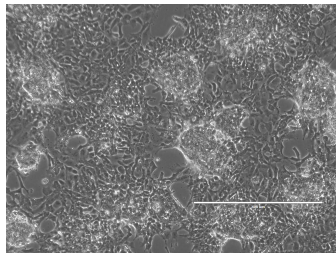

Prdm14 rescue

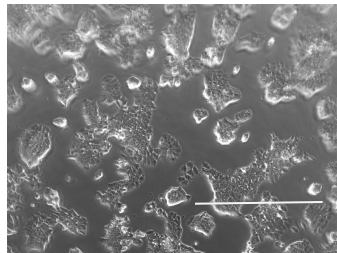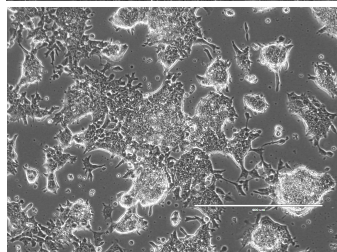

wt, serum+LIF

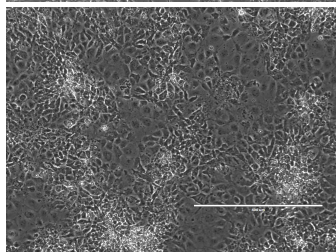

*Mtgr1*<sup>-/-</sup>, clone2

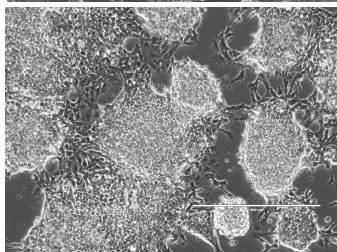

Mtgr1 rescue

Supplement: supp [file elife-10150-supp-v1.zip]

**A**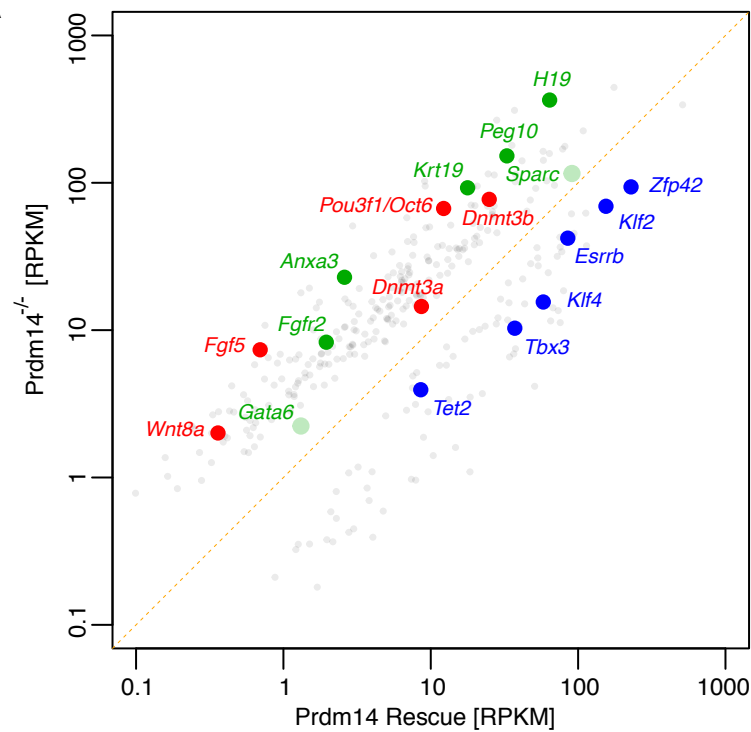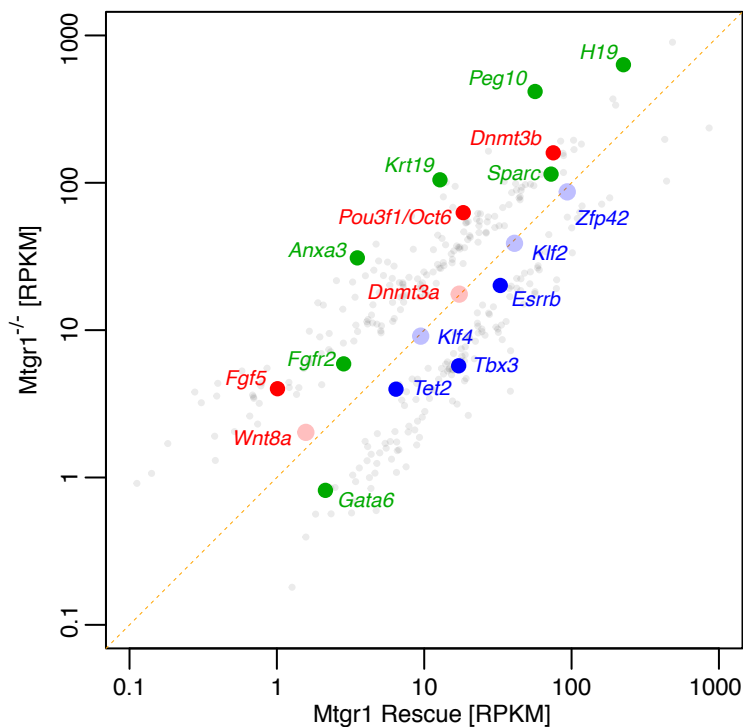**B**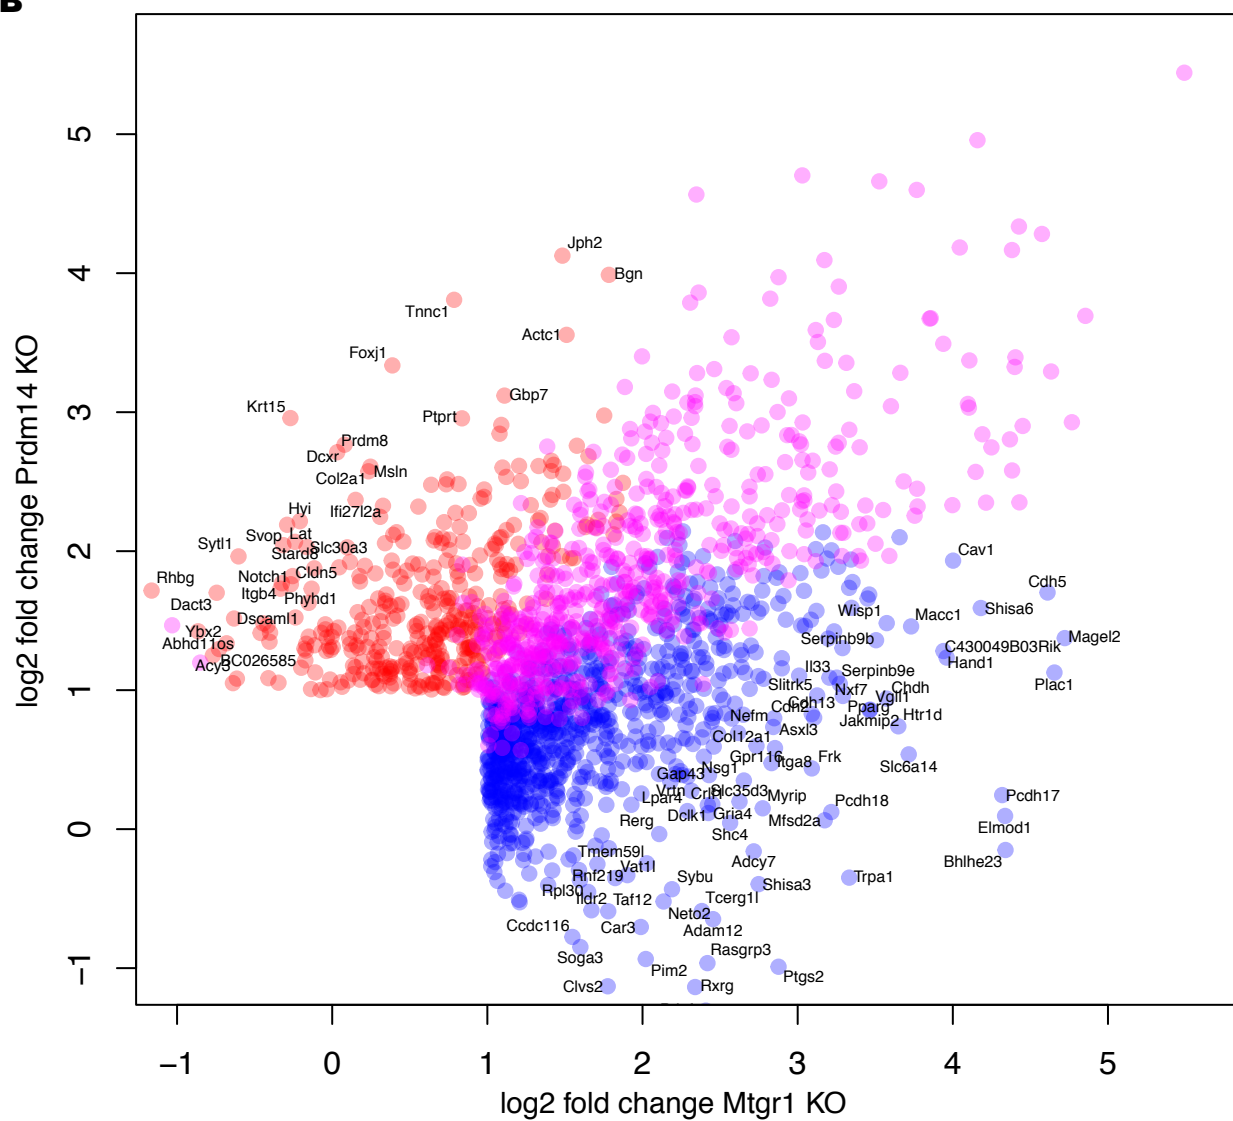

Supplement: supp [file elife-10150-supp-v1.zip]

**A**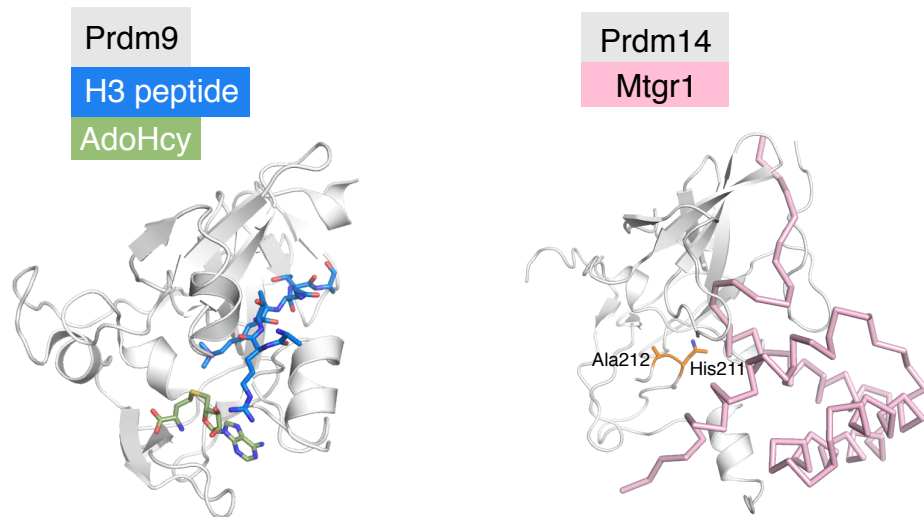**B**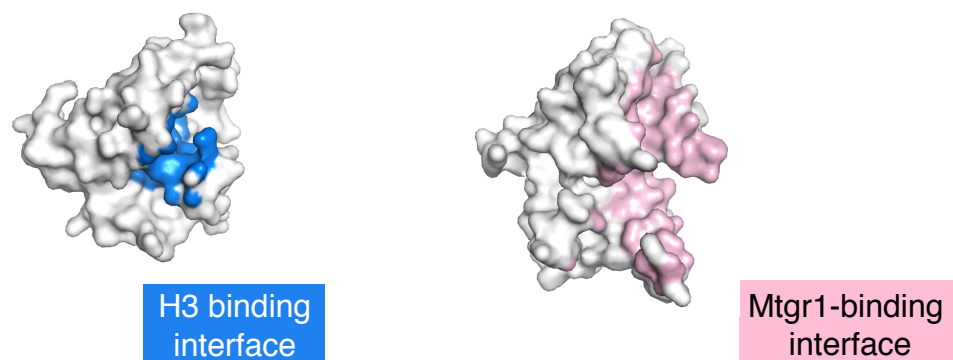**C**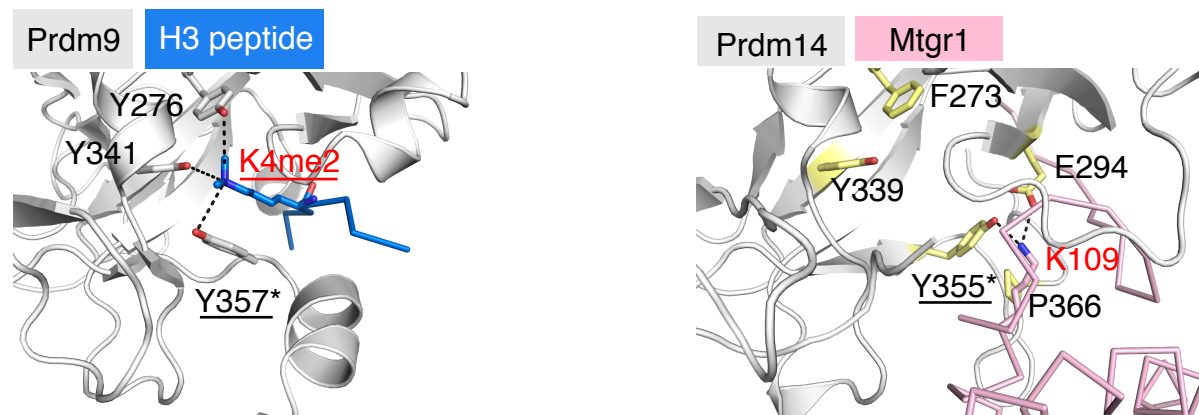

Supplement: supp [file elife-10150-supp-v1.zip]

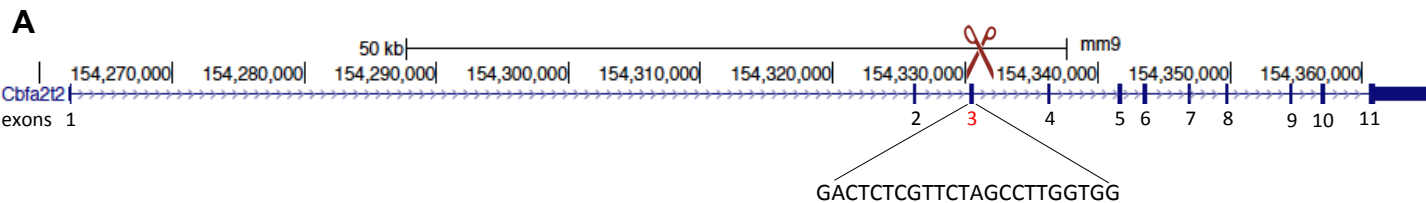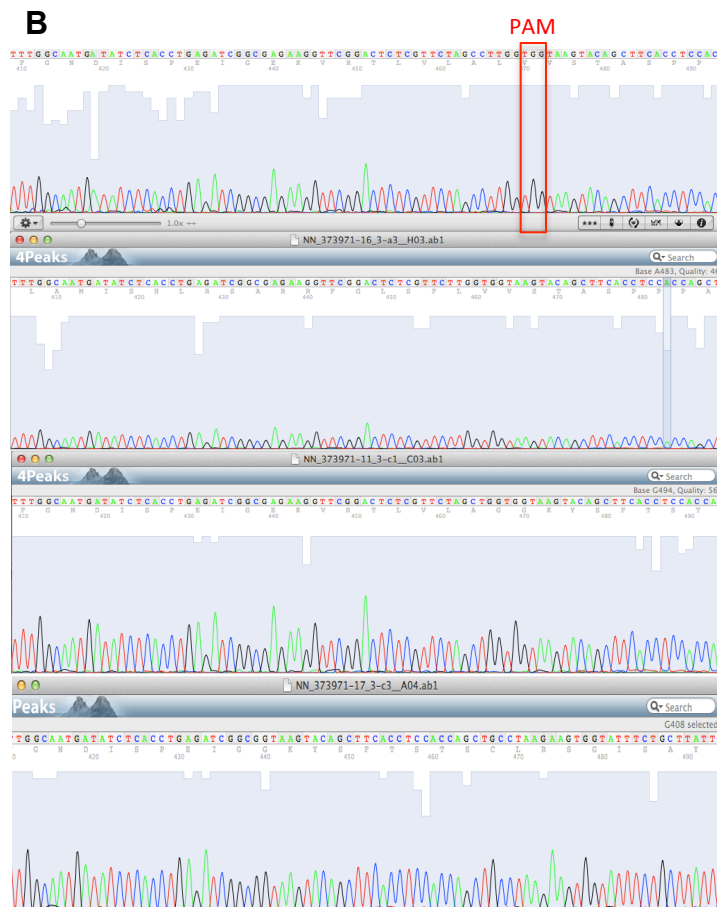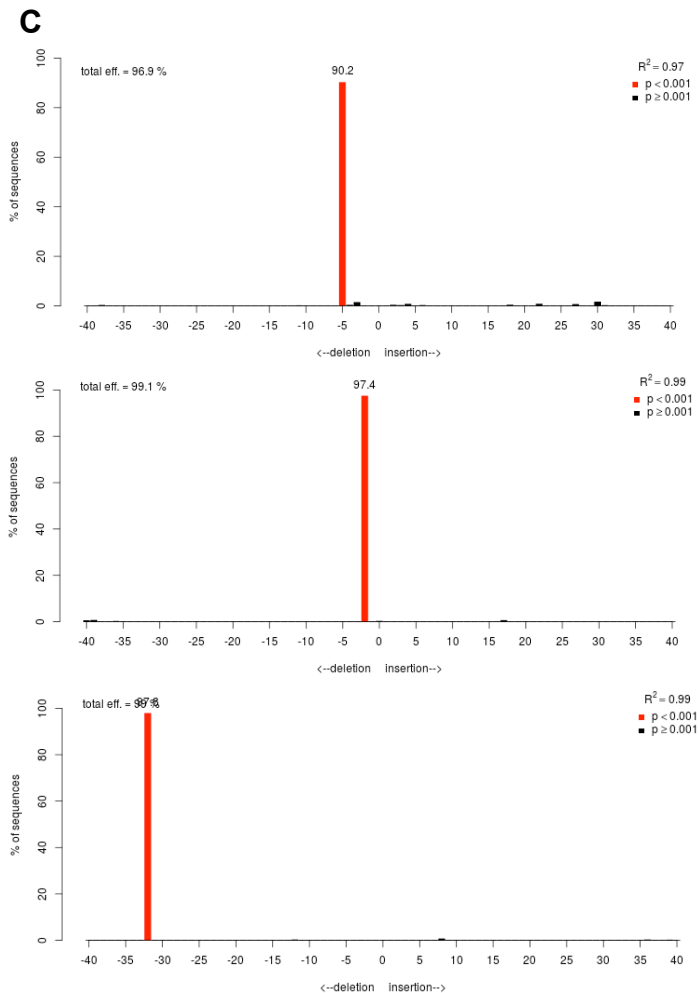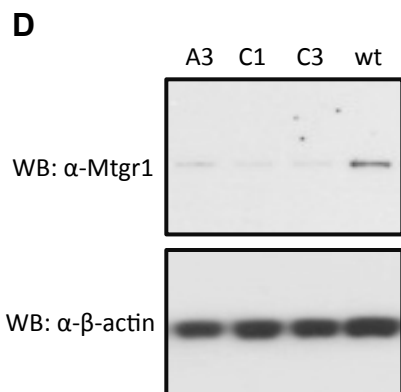

Supplement: supp [file elife-10150-supp-v1.zip]

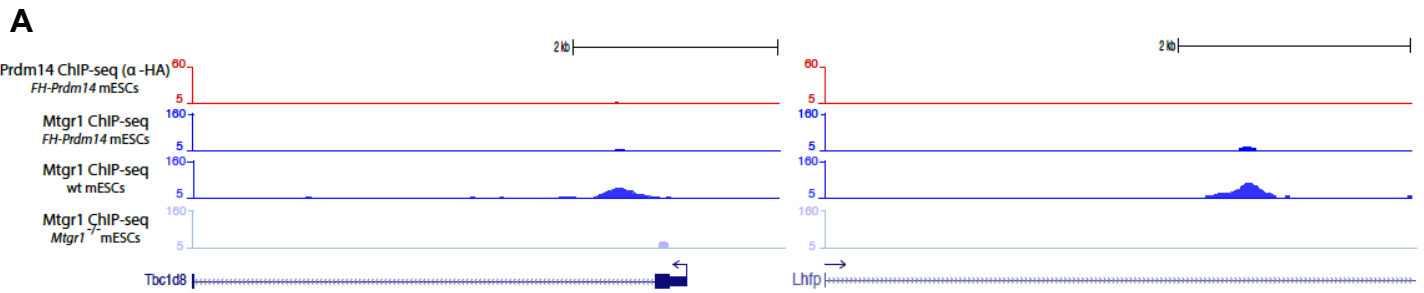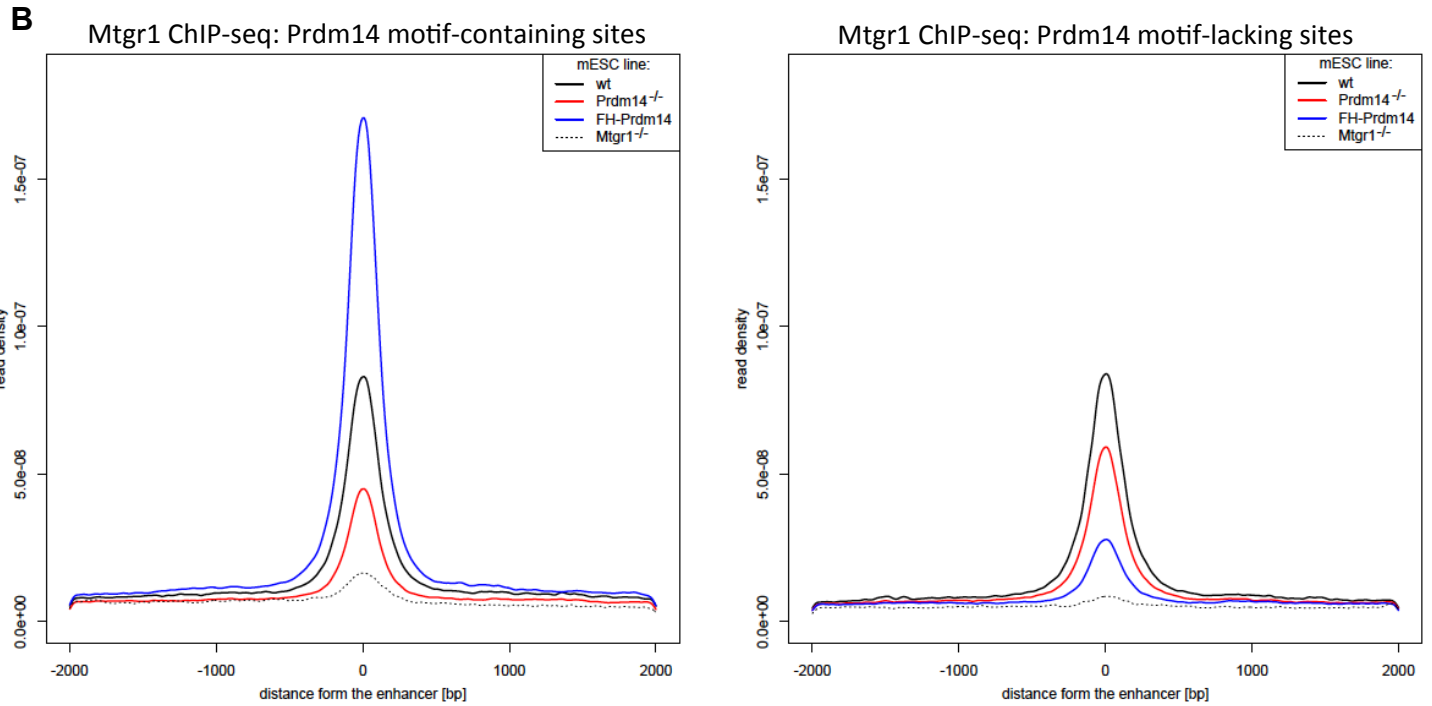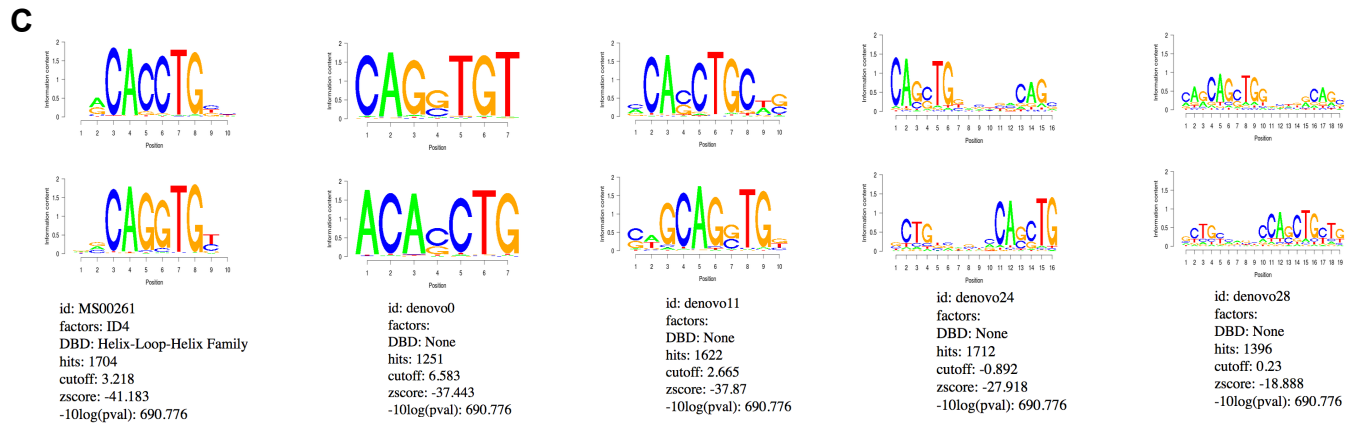

Supplement: supp [file elife-10150-supp-v1.zip]

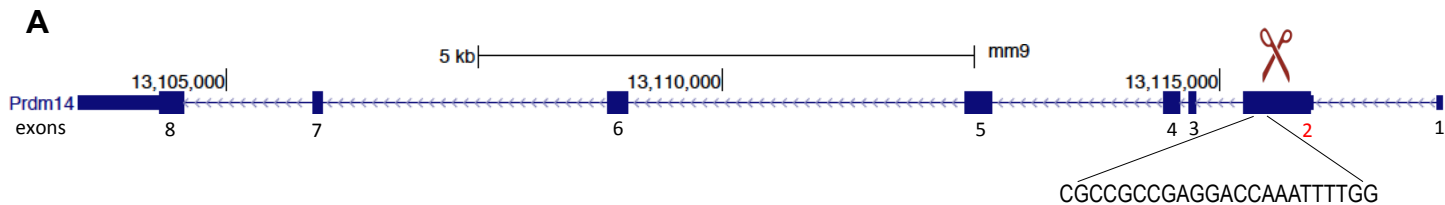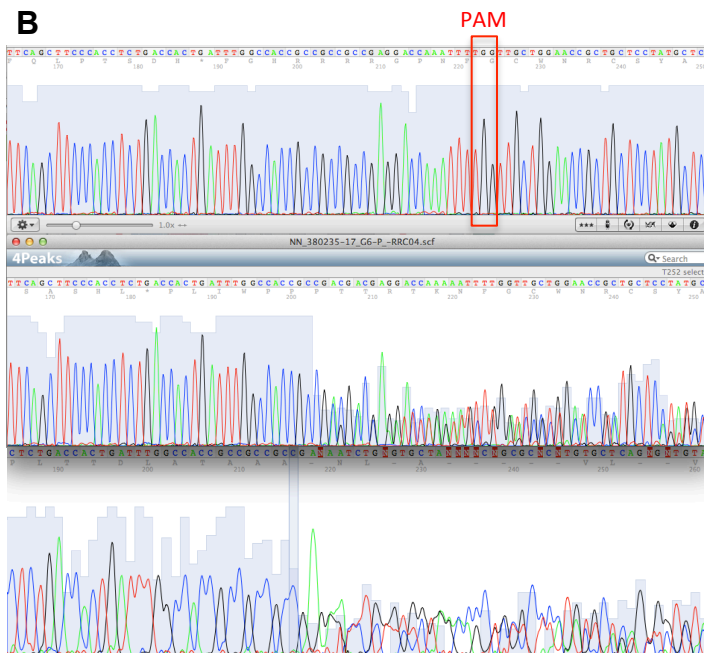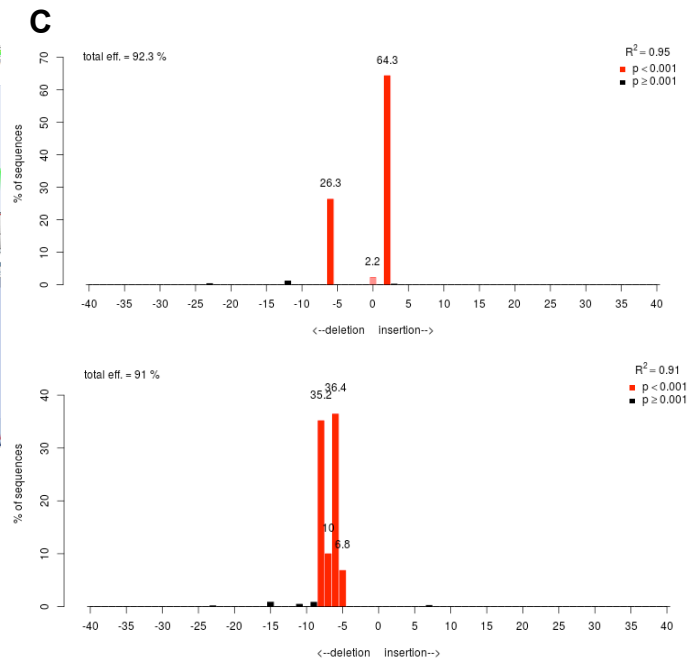

Supplement: supp [file elife-10150-supp-v1.zip]

**A**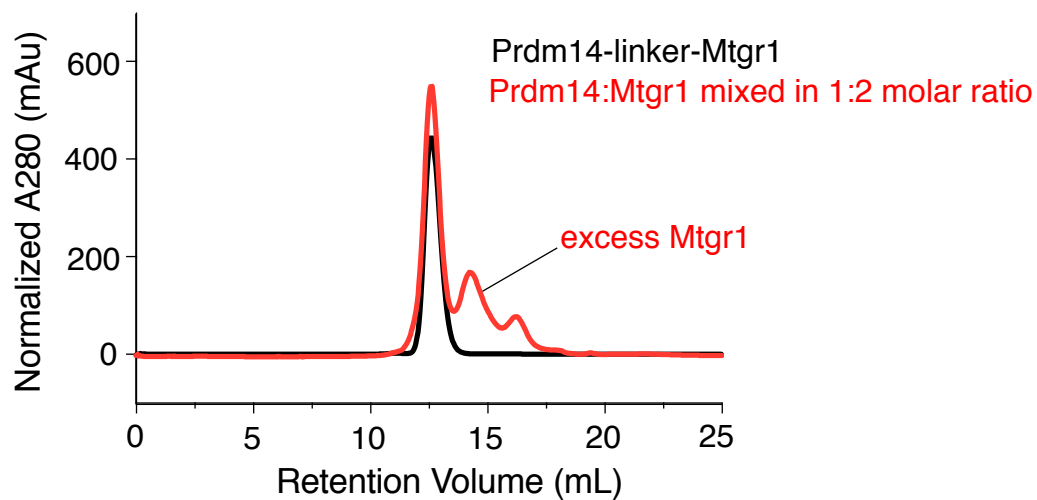**B**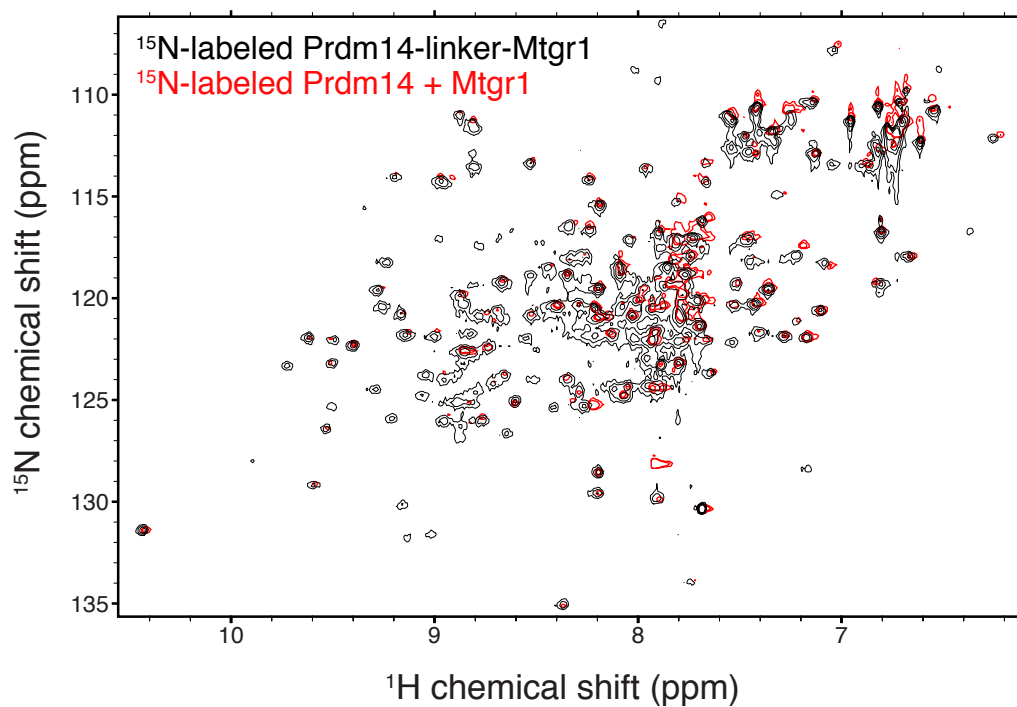**C**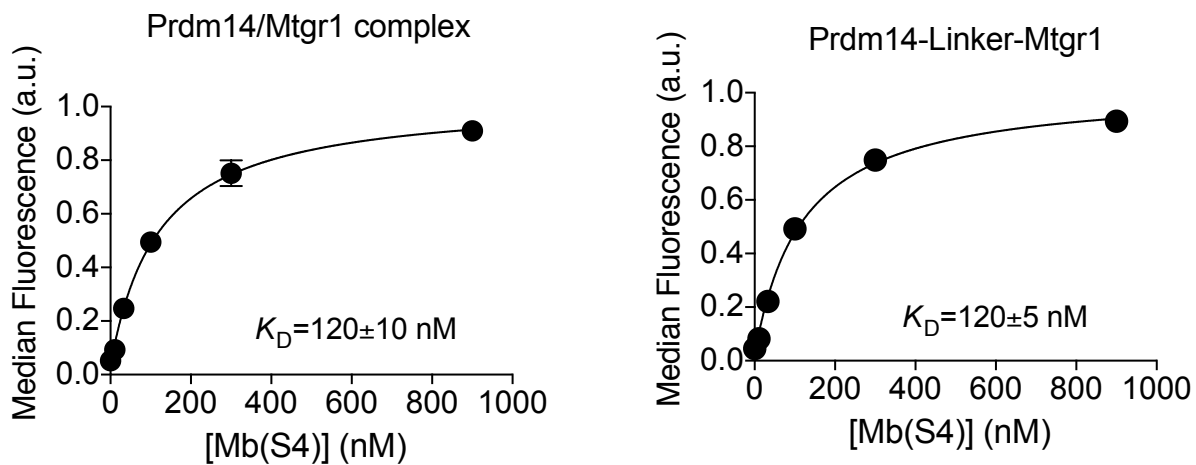

Supplement: supp [file elife-10150-supp-v1.zip]

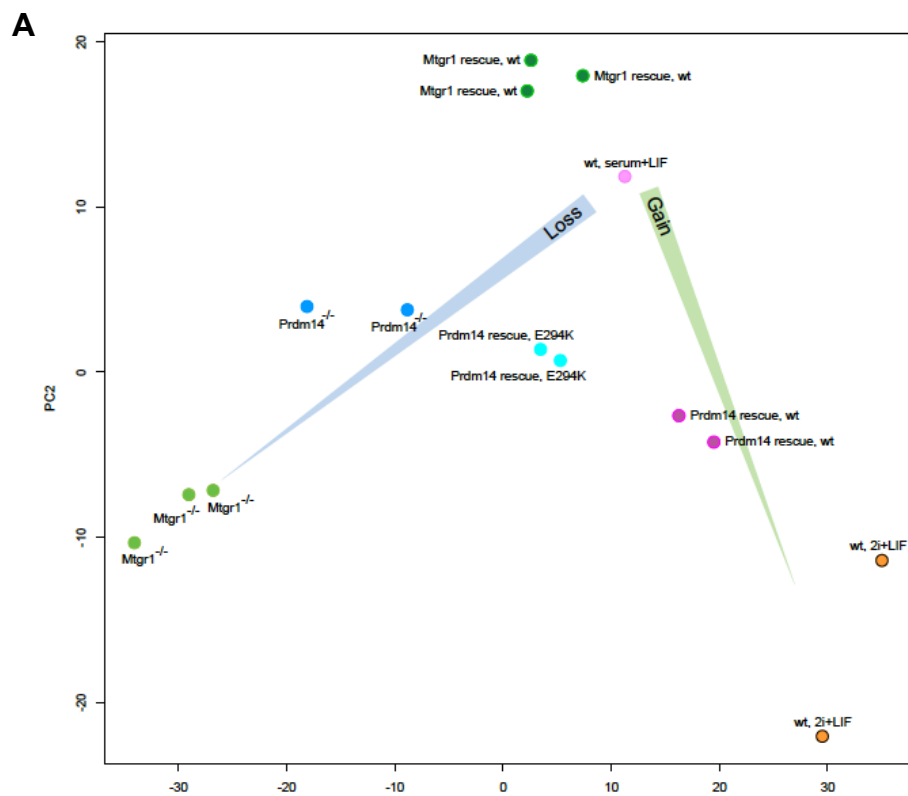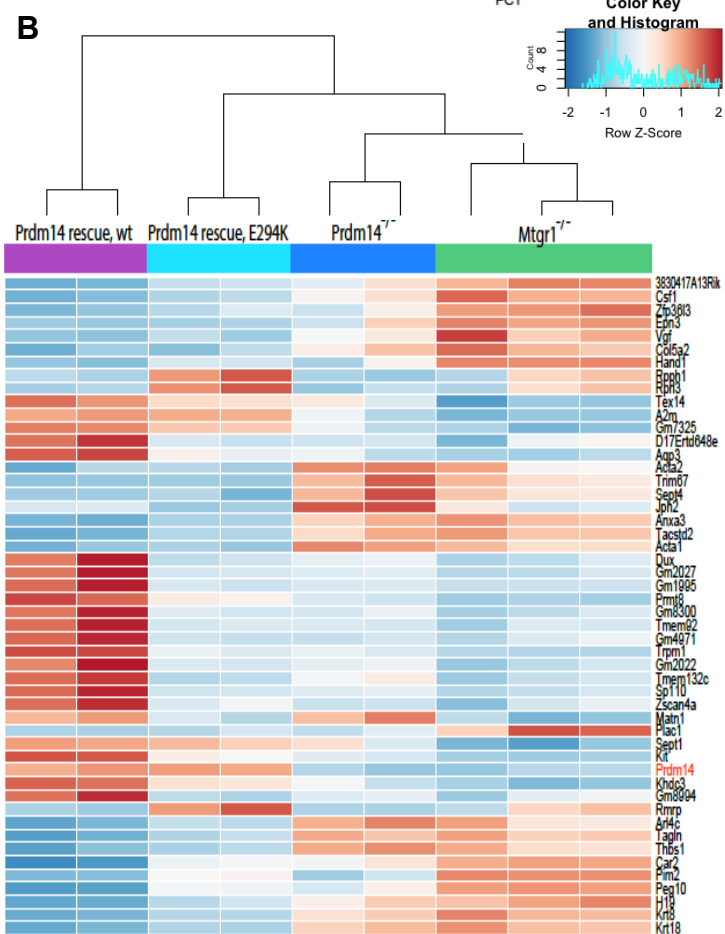

Supplement: supp [file elife-10150-supp-v1.zip]

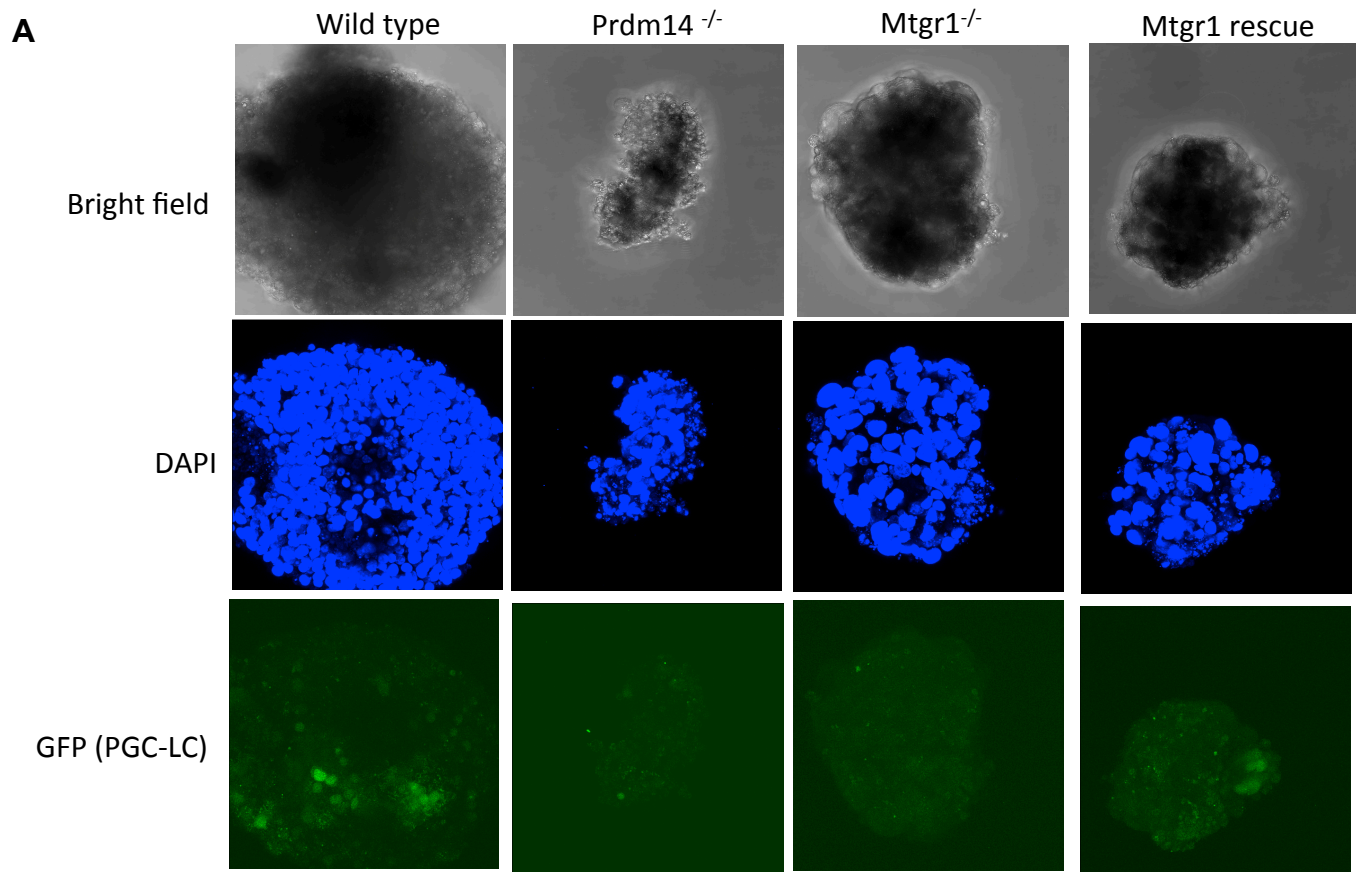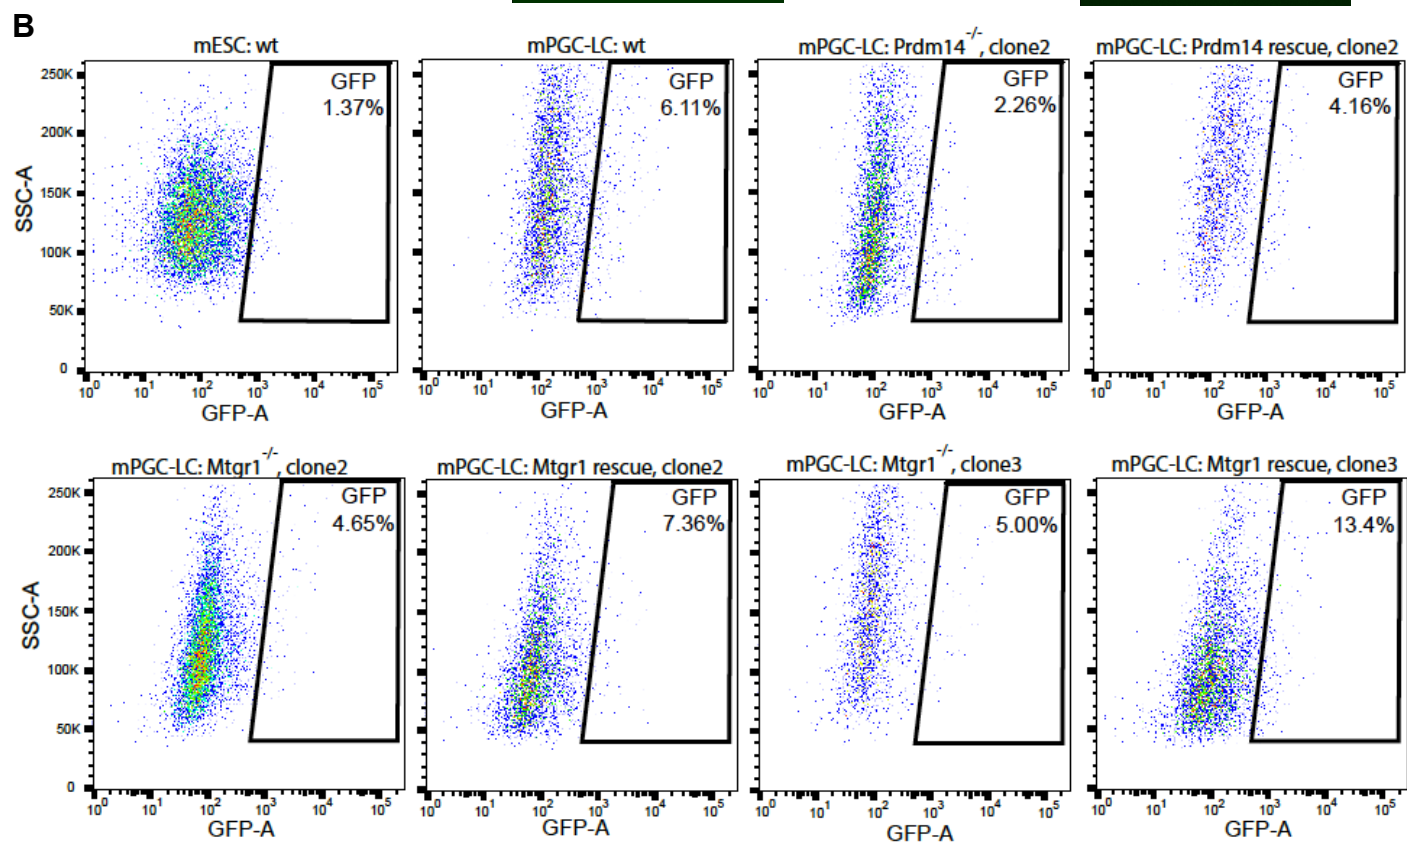

Supplement: supp [file elife-10150-supp-v1.zip]

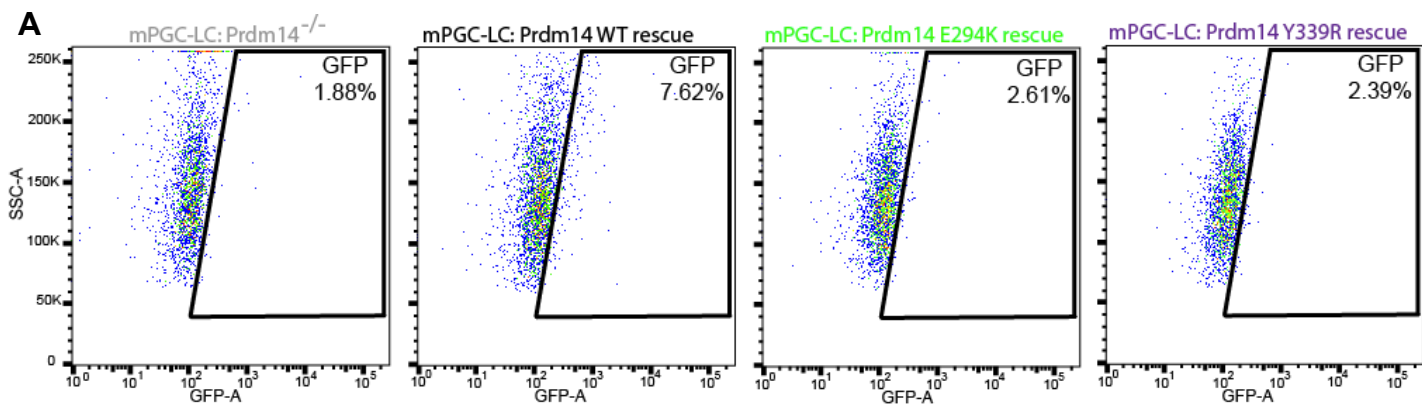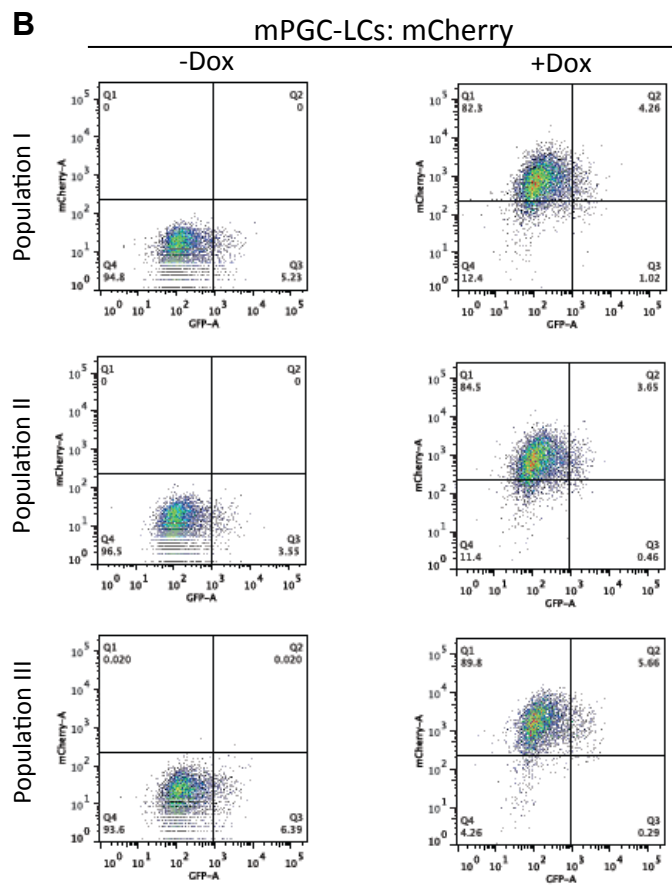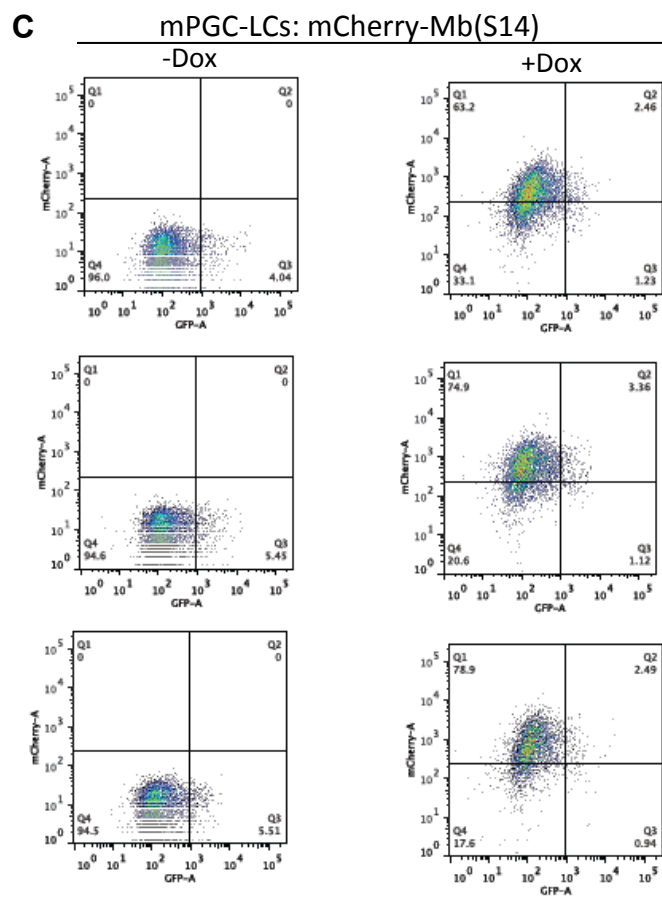

Supplement: supp [file elife-10150-supp-v1.zip]
